# Supplementary material
Source: Elsevier journal article supplement (http://www.natap.org/2022/HCV/mmc4.pdf)
Supplement: mmc4 [file mmc4.pdf]

# THE LANCET

## Gastroenterology & Hepatology

### Supplementary appendix 4

This appendix formed part of the original submission and has been peer reviewed.  
We post it as supplied by the authors.

Supplement to: Litwin AH, Lum PJ, Taylor LE, et al. Patient-centred models of hepatitis C treatment for people who inject drugs: a multicentre, pragmatic randomised trial. *Lancet Gastroenterol Hepatol* 2022; **7**: 1112–27.

## Supplementary Materials

### TABLE OF CONTENTS

**Figure S1.** CONSORT Flow Chart of the HERO Study. DAA, direct-acting antivirals; HCV, hepatitis C virus; ITT, intention to treat; mDOT, modified directly observed therapy; mITT, modified intention to treat; PN, patient navigation; PP, per protocol; SVR, sustained virologic rate.

**Figure S2.** Factors Associated with SVR in the ITT (Panel A) and PP (Panel B) Populations.

**Figure S3.** Factors Associated with Adherence in the PP Population

**Figure S4.** Factors Associated with Treatment Initiation in the ITT Population.

**Figure S5.** Factors Associated with Treatment Completion in the ITT (Panel A), mITT (Panel B), and PP (Panel C) Populations.

**Figure S6.** Proportion of Patients with Active Drug Use.

**Figure S7.** Factors with Between-Subgroup Heterogeneous Intervention Effects on SVR in the ITT (Panel A), mITT (Panel B) and PP (Panel C) Populations

**Figure S8.** Factors with Between-Subgroup Heterogeneous Intervention Effects on Adherence in the mITT (Panel A) and PP (Panel B) Populations

**Figure S9.** Factors with Between-Subgroup Heterogeneous Intervention Effects on Treatment Initiation in the ITT Population

**Figure S10.** Factors with Between-Subgroup Heterogeneous Intervention Effects on Treatment Completion in the ITT (Panel A), mITT (Panel B) and PP (Panel C) Populations

**Table S1.** Baseline Characteristics of HERO Participants Among PP Sample.

**Table S2.** Distribution of SAE by the study arms from N=219 participants (N=109 from mDOT and N=110 for PN)

## List of Investigators

**Johns Hopkins:** The authors thank Terrie Alexander, Lisa Burgess, CaSaundra Bush, Wanda Commander, Jacqueline Darmody, Kimberly Fuller, Lindsey Gaydos, Jeffrey Green, Carlisle Harvey, Shima Idries, Khadijat Koletowo, Robin (Sara) Lord Smith, Julie McArthur, William Miller Jr., Boatemaa Nitri-Reid, Kristie O'Neal, Mark Sulkowski, and Dave Thomas.

**Massachusetts General Hospital/Harvard Medical School:** The authors thank Theresa Minukas, Justin Alves, Megan Porter, Lori Hooley, Gregory Robbins, James Morrill, Rashanna Mckenzie, Rachel Weidenfeld, Katie Johnson, Daniel Church, Marguerite Beiser, Larry Day, Anthony Adreottola, Sarah Wakeman, and Dinah Applewhite.

**Montefiore Medical Center/Albert Einstein College of Medicine:** The authors thank Sheila Reynoso, Yajaira Melendez, Theresa Capra, Louie Jones, Martin Iglesias, Alicia Rodriguez, Camila Gelpi-Acosta, Ric Curtis, Maria Guzman, Monique Defreitas-gordon, Doris Macias, Brenda Thomas, Joseph Hecht, Corina Langert-degori, Michael Ciofoletti, Melody Fontan, Joel Schreiber, and Priyank Vaghashia.

**University of California San Francisco:** The authors thank Emalie Hurliaux, Katie Burk, Rachel McLean, Andrew Reynolds, Janet Grochowski, Ana Mota, Jocelyn Poulin, Alix Strough, Paulette Walton, Melissa Morelli, and Jennifer Siruno.

**University of New Mexico Health Sciences Center:** Mary Carmody, Jessica Reno, Lina Tarhuni, Nick Karnezis, Sandra Sedillo, Paulina Deming, Martha Carvour, Bernadette Jakeman, Justin Laird, Art Salazar, Dawen Liu, Kirsten White, Yvonne Talamantes, and Lauren Knight.

**University of Rhode Island:** The authors thank Bruce Barton, Linda Hurley, Elenita Arias, Donald Dailey, Jaclynn Kurpewski, Sujata Sahu, Kimberly Rapoza, Thomas Bertrand, Raynald Joseph, Osvaldo Lugo, Helen Patterson, Deborah Good, Pam Poethke, Deborah Perez, Susan Hart, Jolanta Olejnik-Nave, Sheila Tumilty, and Matt Boudreau.

**University of Washington:** The authors thank Alex Gojic, MarkJason T. Cabudol, Roger Huamani Velasquez, Alexandra Ross, Molly Carney, Steve Woolworth, Lisa Chew, Sara Jackson, Rachel Nickel, Arman Altug, Madison McPadden, Maryross Olanday, Marjurie Severson, Robert Kubiniecc, and Jim Anderson.

**West Virginia University:** The authors thank Erika Pallie, John Guilfoose, Laura Jones, Kayleigh Burner, Emily Baldwin, and Caitlin Sussman.

**Figure S1.** CONSORT Flow Chart.

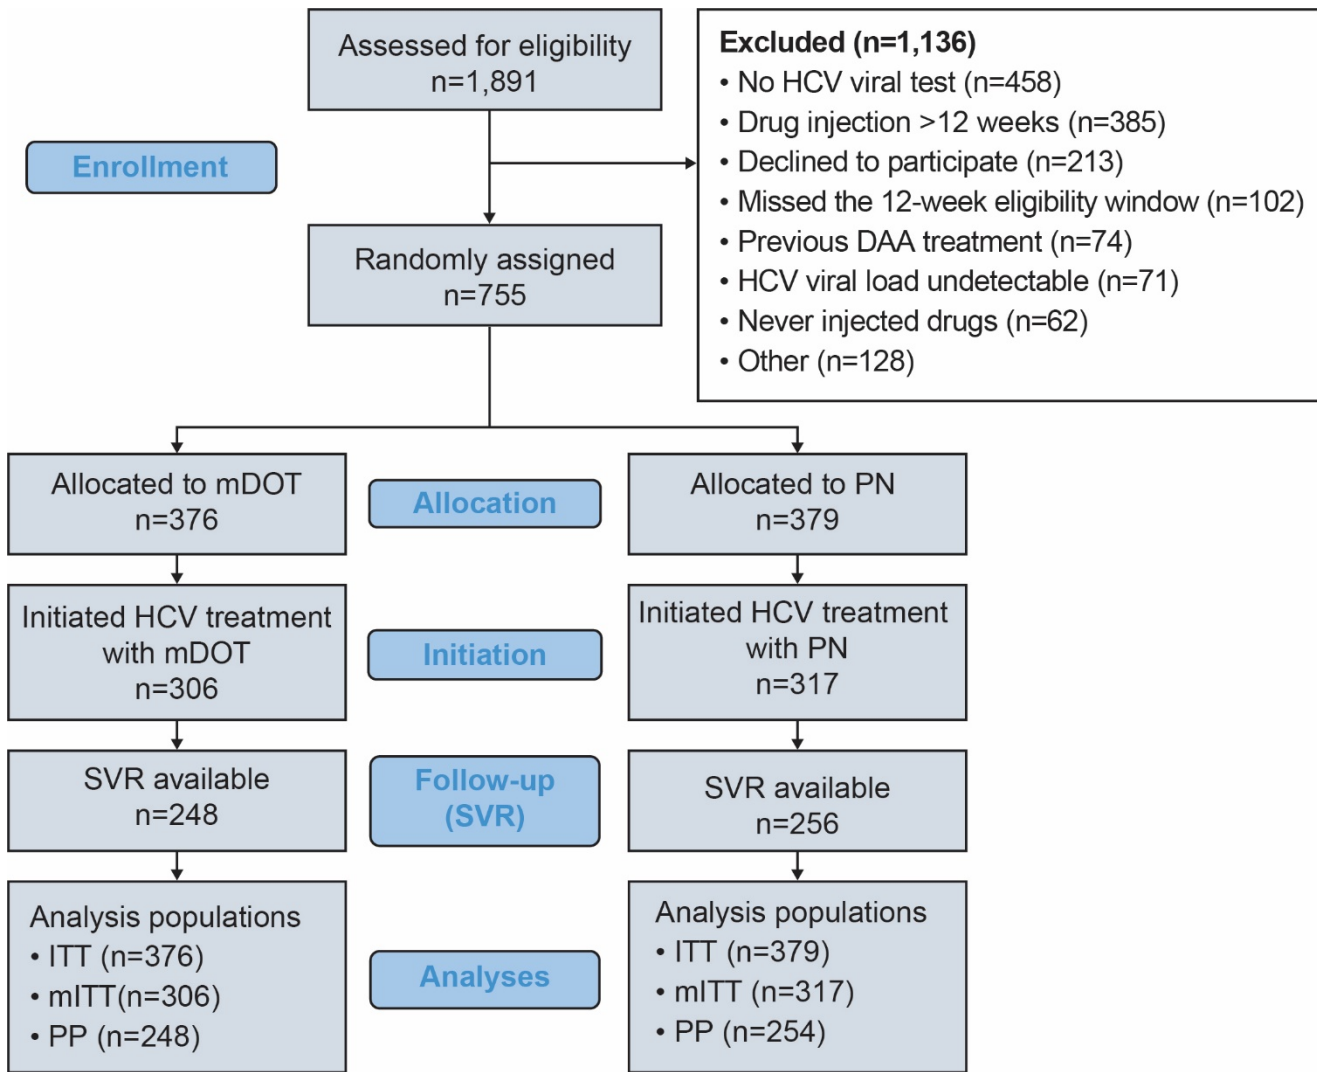

DAA, direct-acting antivirals; HCV, hepatitis C virus; ITT, intention to treat; mDOT, modified directly observed therapy; mITT, modified intention to treat; PN, patient navigation; PP, per protocol; SVR, sustained virologic rate.



**Figure S2. Factors Associated With SVR in the ITT (Panel A) and PP (Panel B) Populations.**

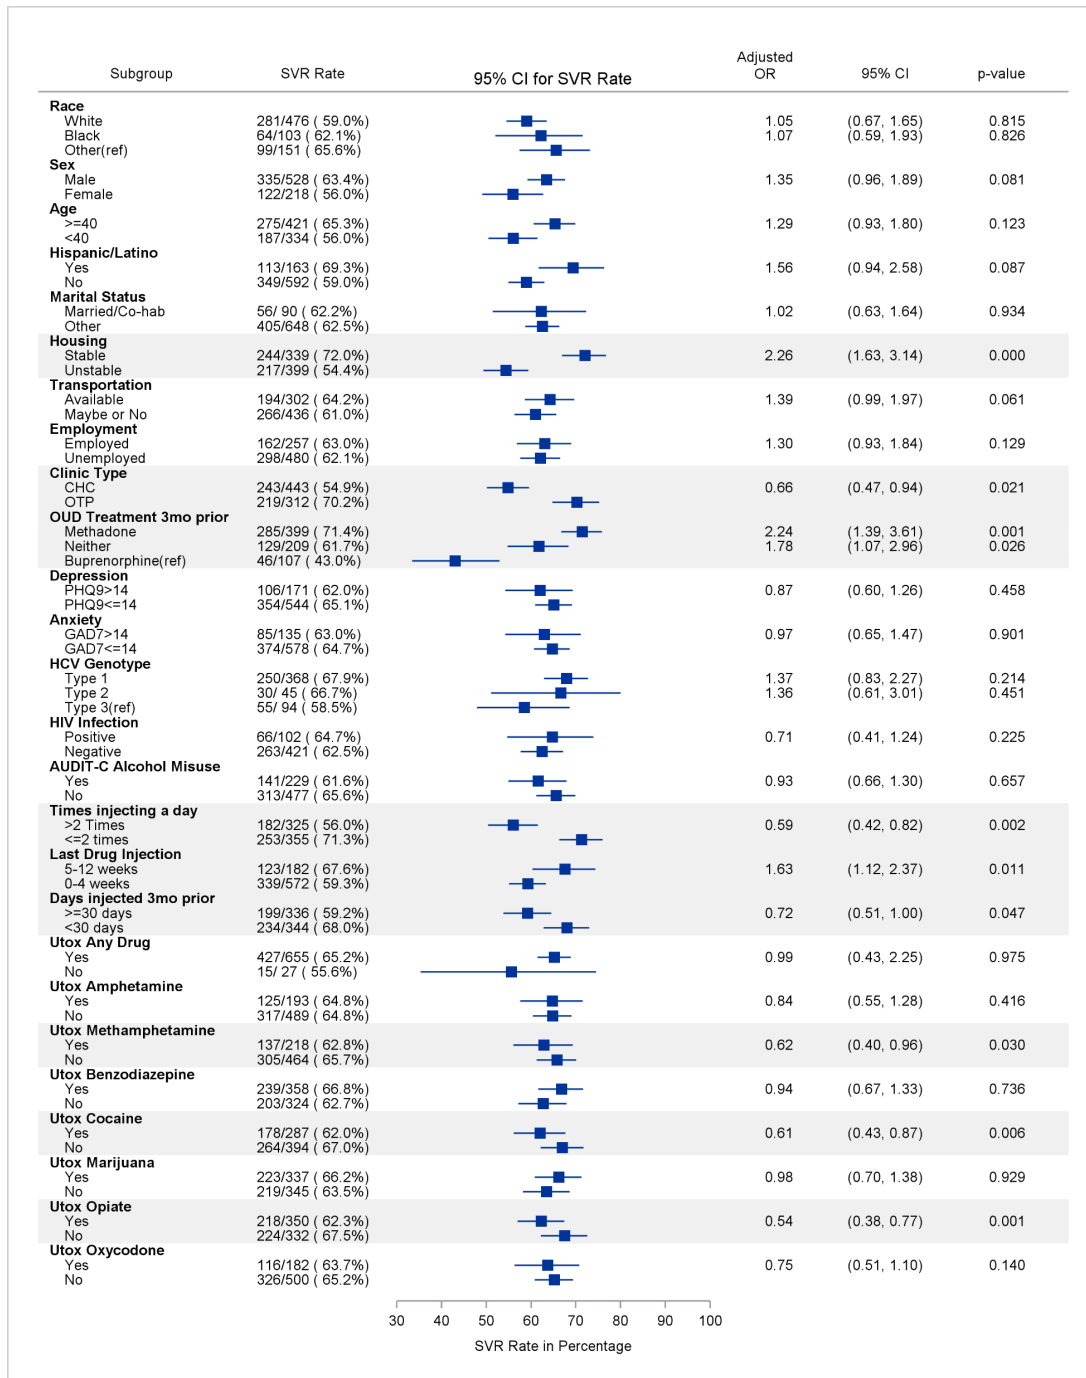

B

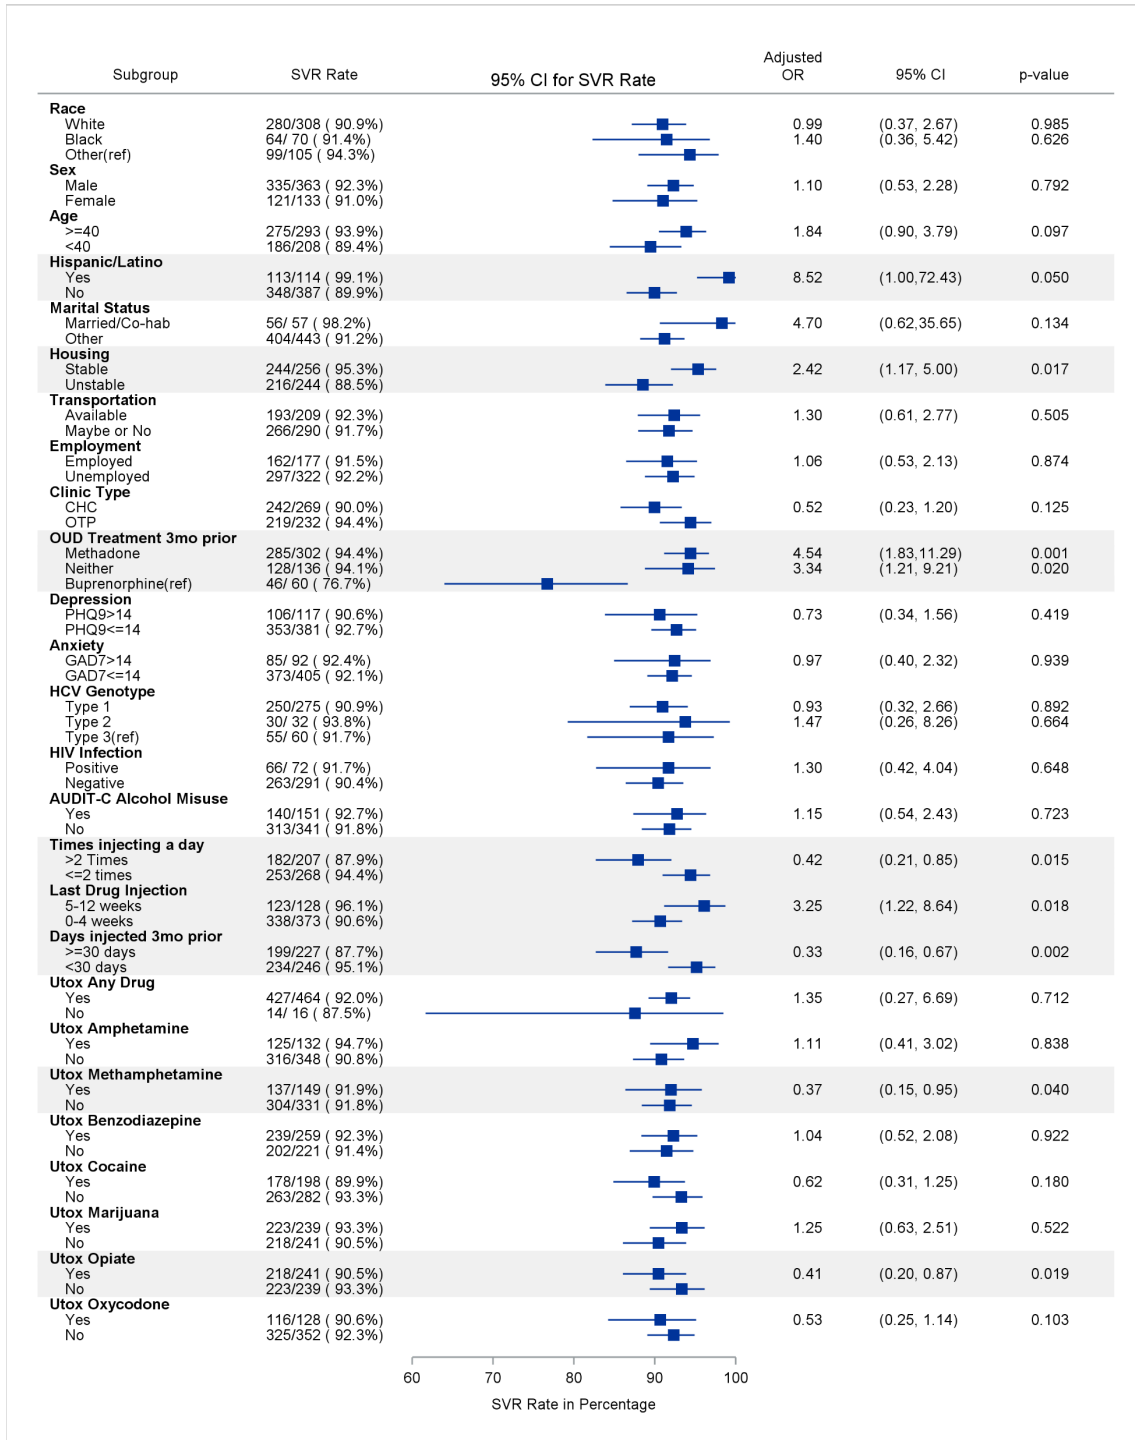

AUDIT-C, Alcohol Use Disorders Identification Test; CHC, community health centers; Co-hab, cohabitation; GAD7, general anxiety disorder 7-item; HCV, hepatitis C virus; ITT, intention to treat; OR, odds ratio; OTP, opioid treatment programs; OUD, opioid use disorder; PHQ-9, Patient Health Questionnaire-9; SVR, sustained virologic response; UTOX, urine toxicology screen.

**Figure S3.** Factors Associated With Adherence in the PP Population.

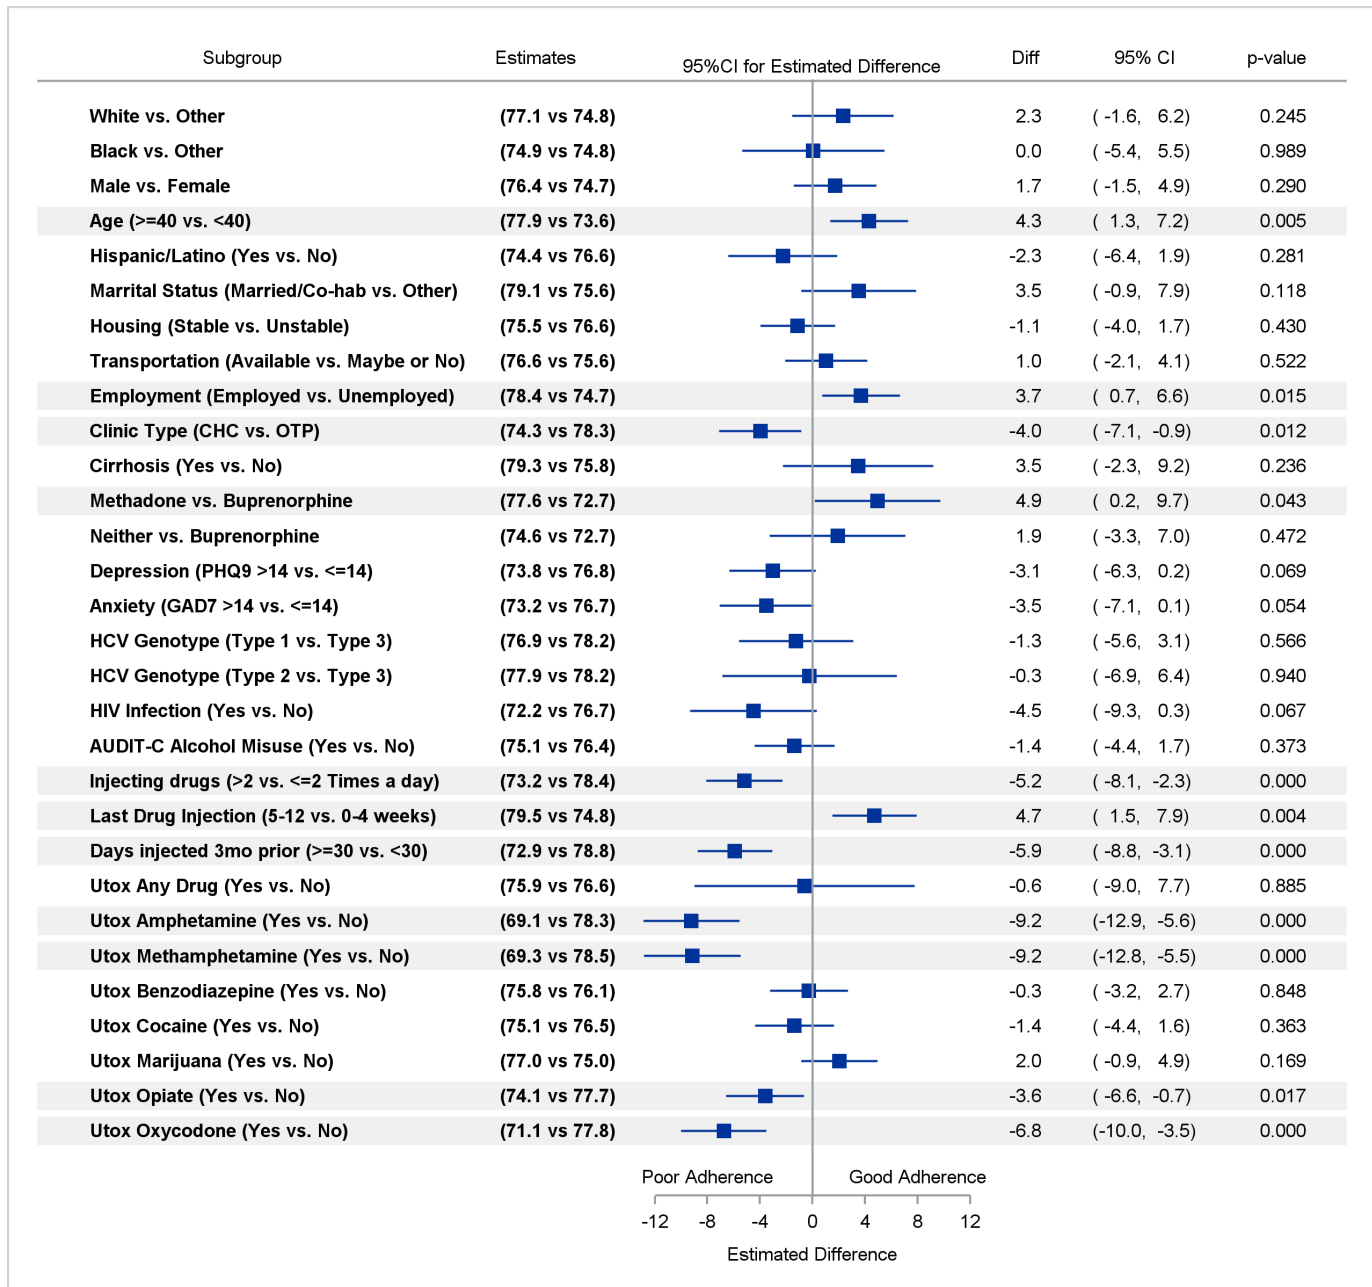

AUDIT-C, Alcohol Use Disorders Identification Test; CHC, community health centers; Co-hab, cohabitation; diff, difference; GAD7, general anxiety disorder 7-item; HCV, hepatitis C virus; OR, odds ratio; OTP, opioid treatment programs; OUD, opioid use disorder; PHQ-9, Patient Health Questionnaire-9; SVR, sustained virologic response; UTOX, urine toxicology screen.

**Figure S4. Factors Associated With Treatment Initiation in the ITT Population.**

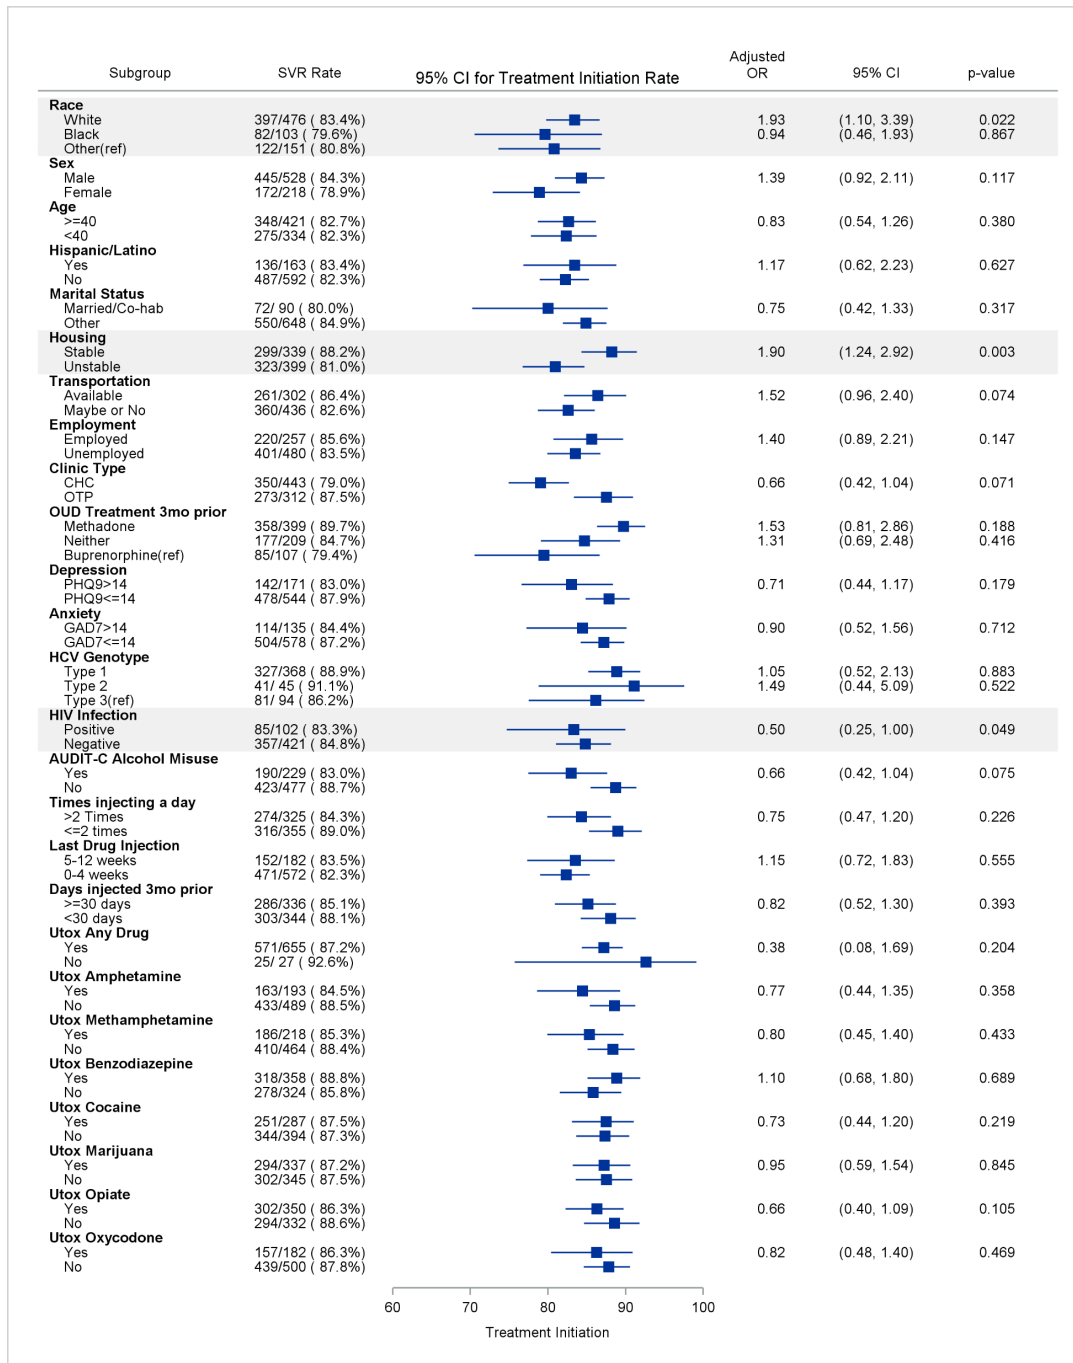

AUDIT-C, Alcohol Use Disorders Identification Test; CHC, community health centers; Co-hab, cohabitation; GAD7, general anxiety disorder 7-item; HCV, hepatitis C virus; ITT, intention to treat; OR, odds ratio; OTP, opioid treatment programs; OUD, opioid use disorder; PHQ-9, Patient Health Questionnaire-9; SVR, sustained virologic response; UTOX, urine toxicology screen.

**Figure S5. Factors Associated With Treatment Completion in the ITT (Panel A), mITT (Panel B), and PP (Panel C) Populations.**

A

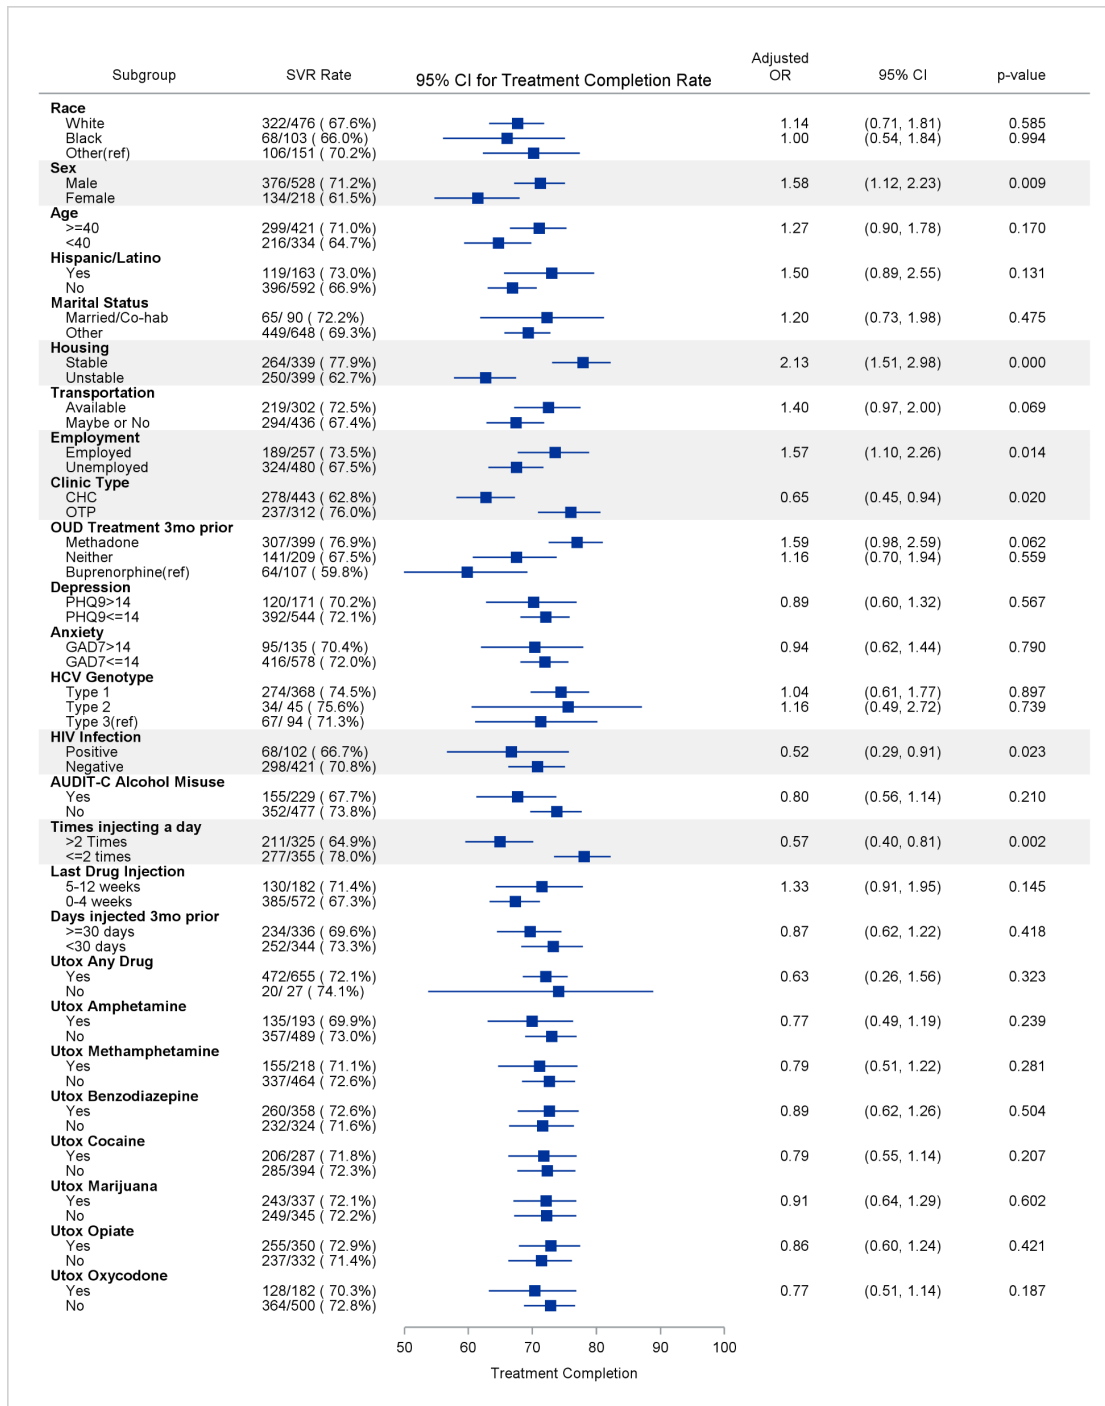

B

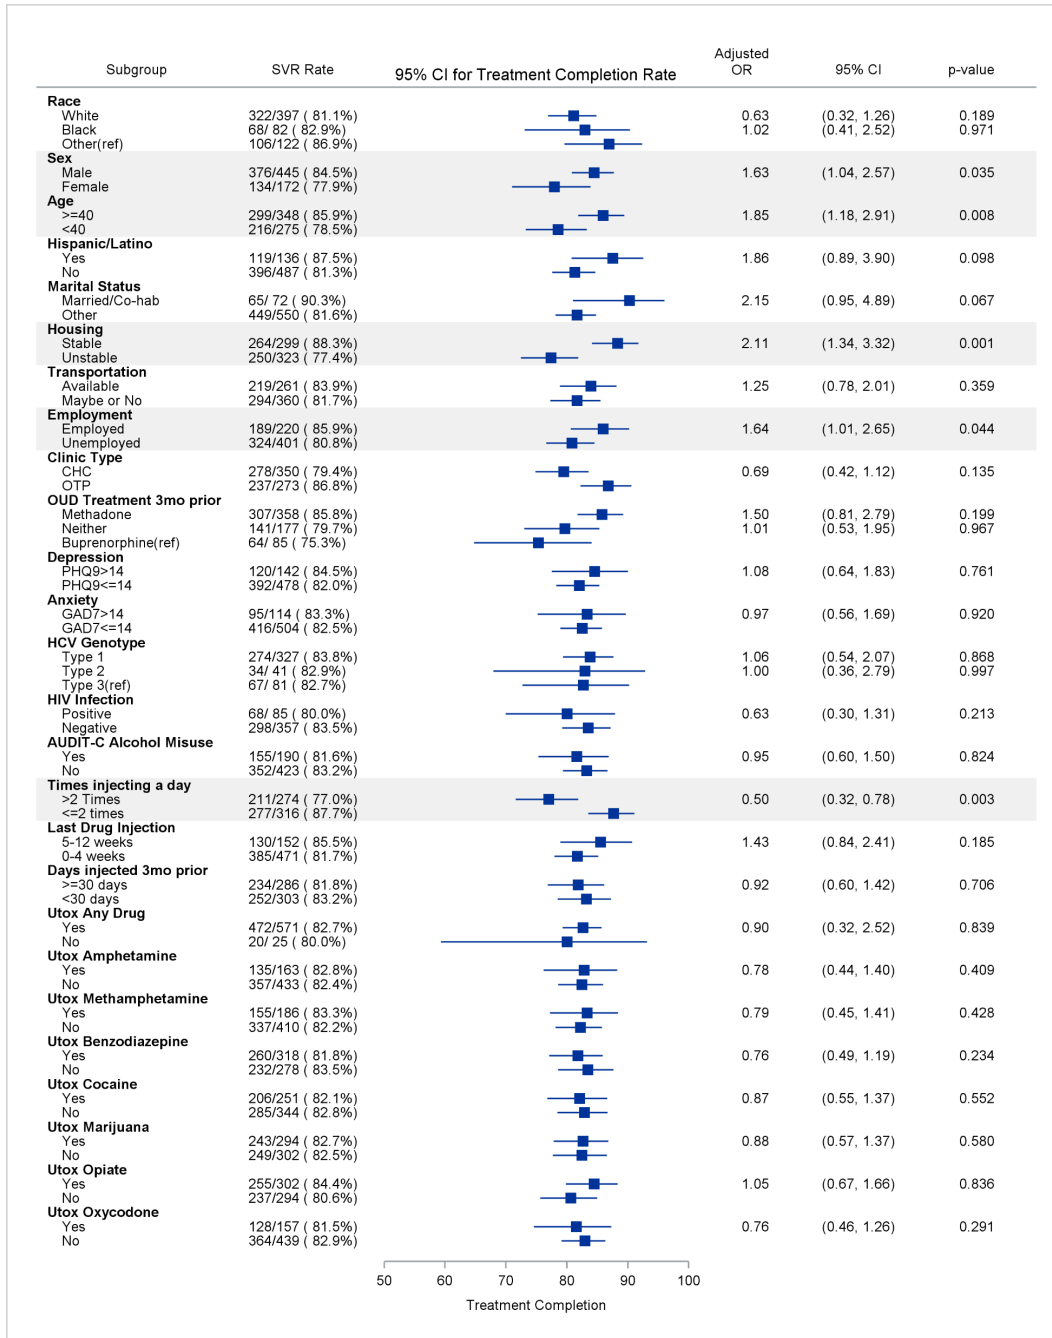

C

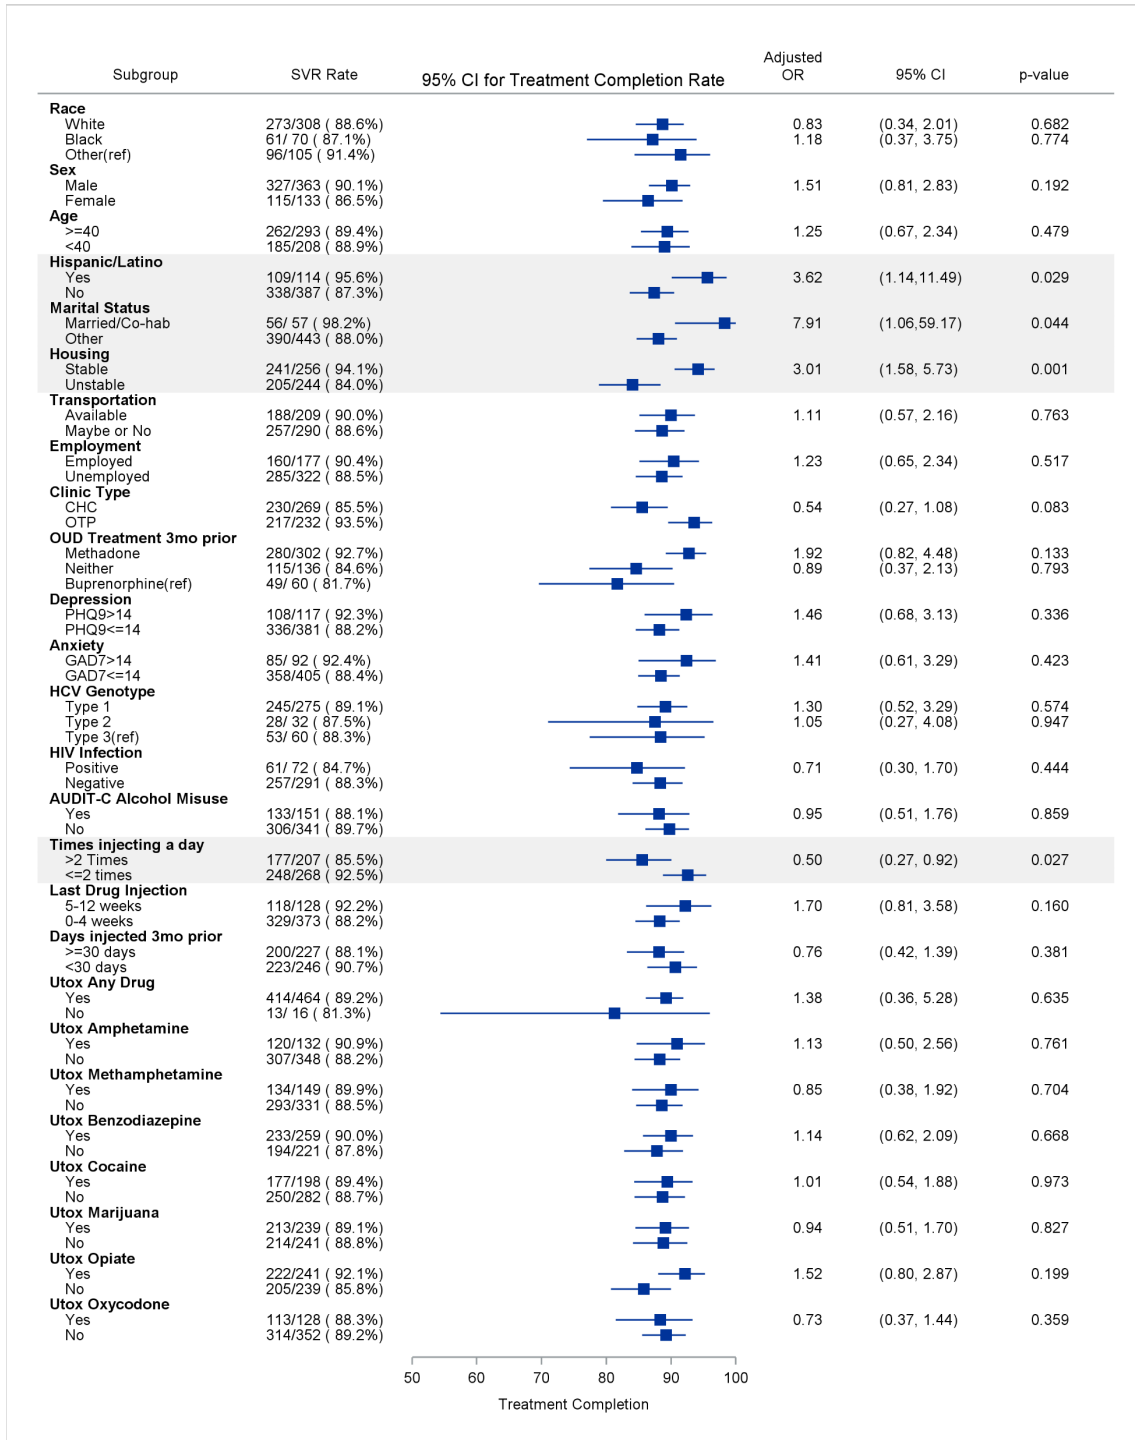

Figure S6. Proportion of Patients With Active Drug Use.

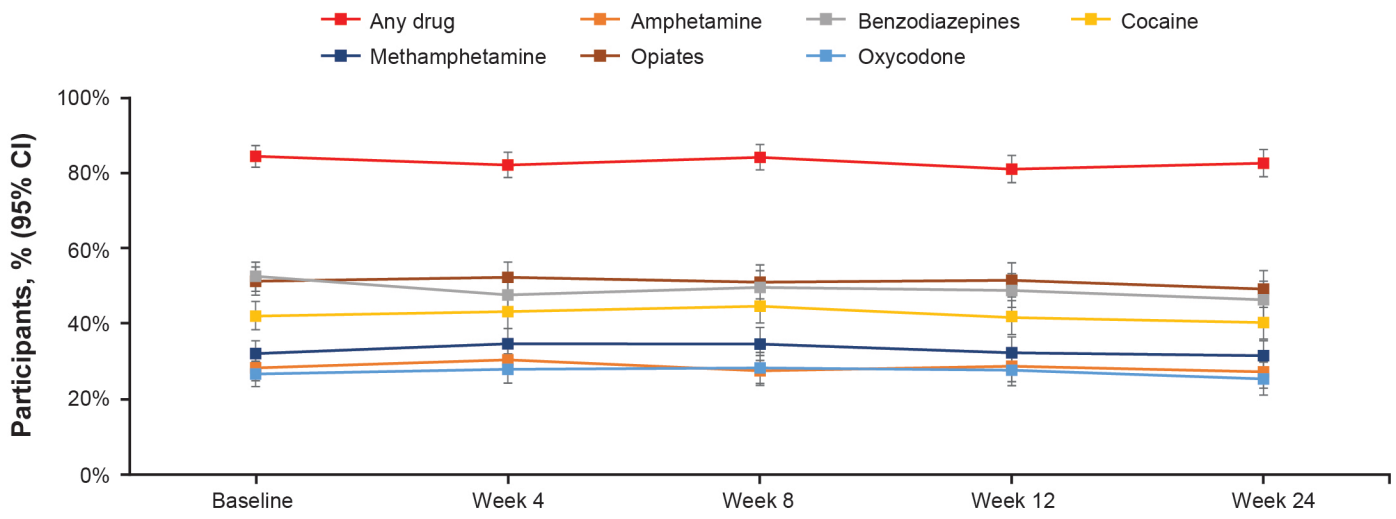



**Figure S7. Factors With Between-Subgroup Heterogeneous Intervention Effects on SVR in the ITT (Panel A), mITT (Panel B), and PP (Panel C) Populations**

**A**

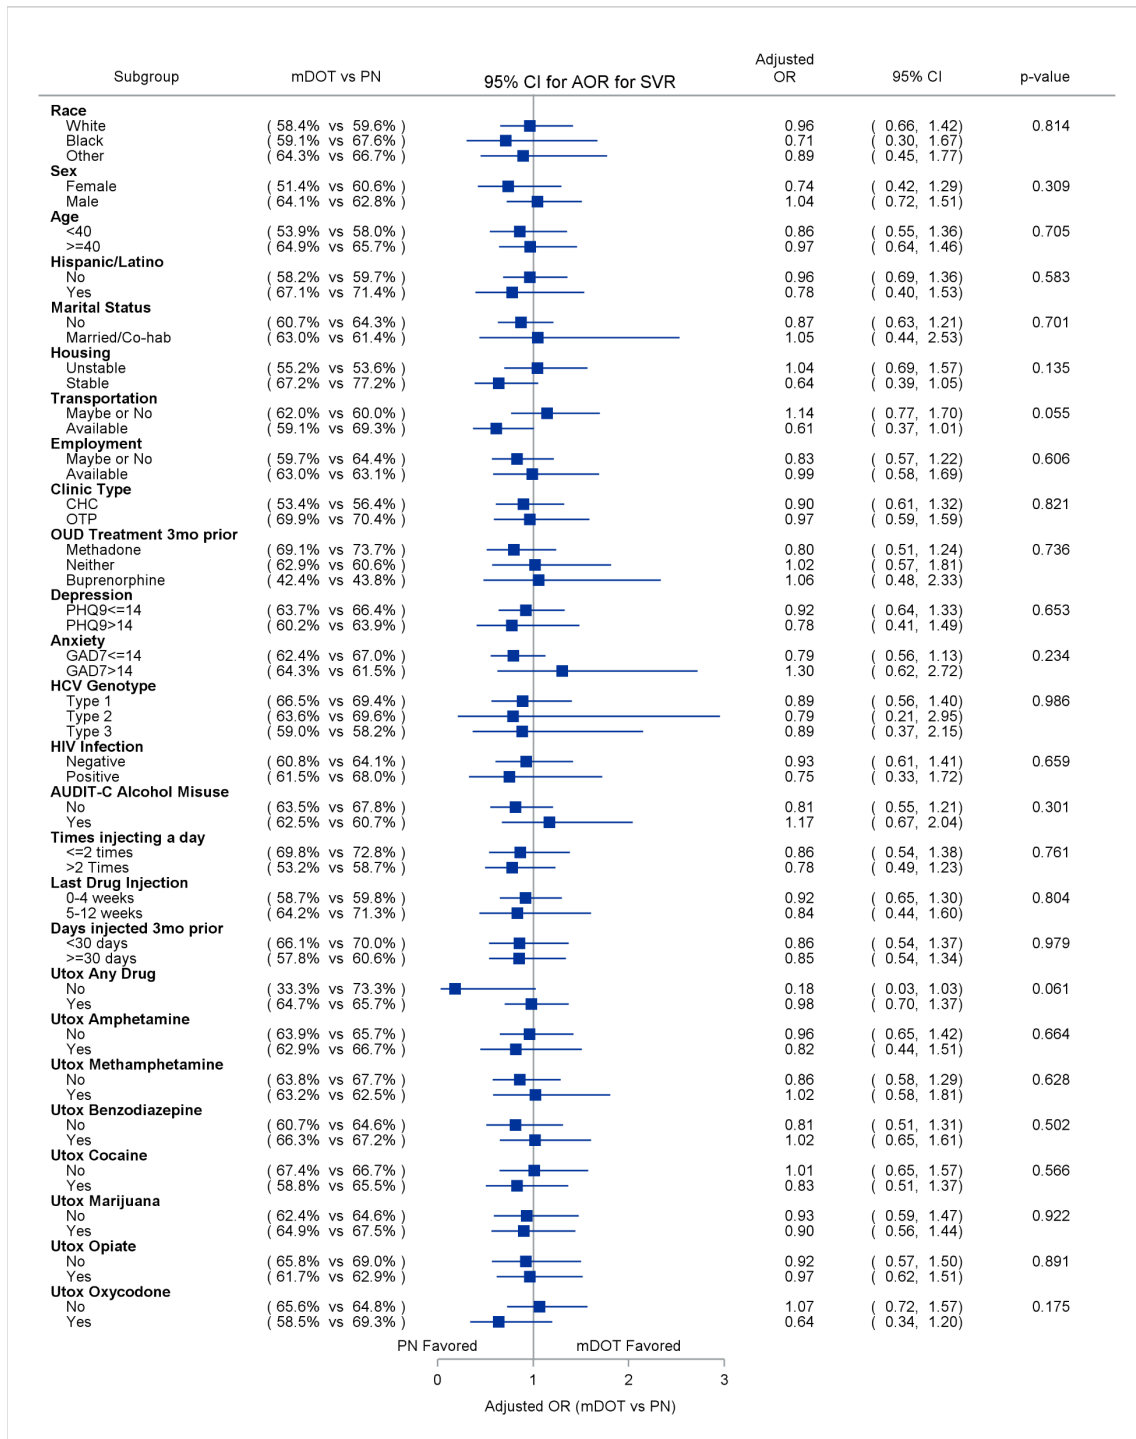

**B**

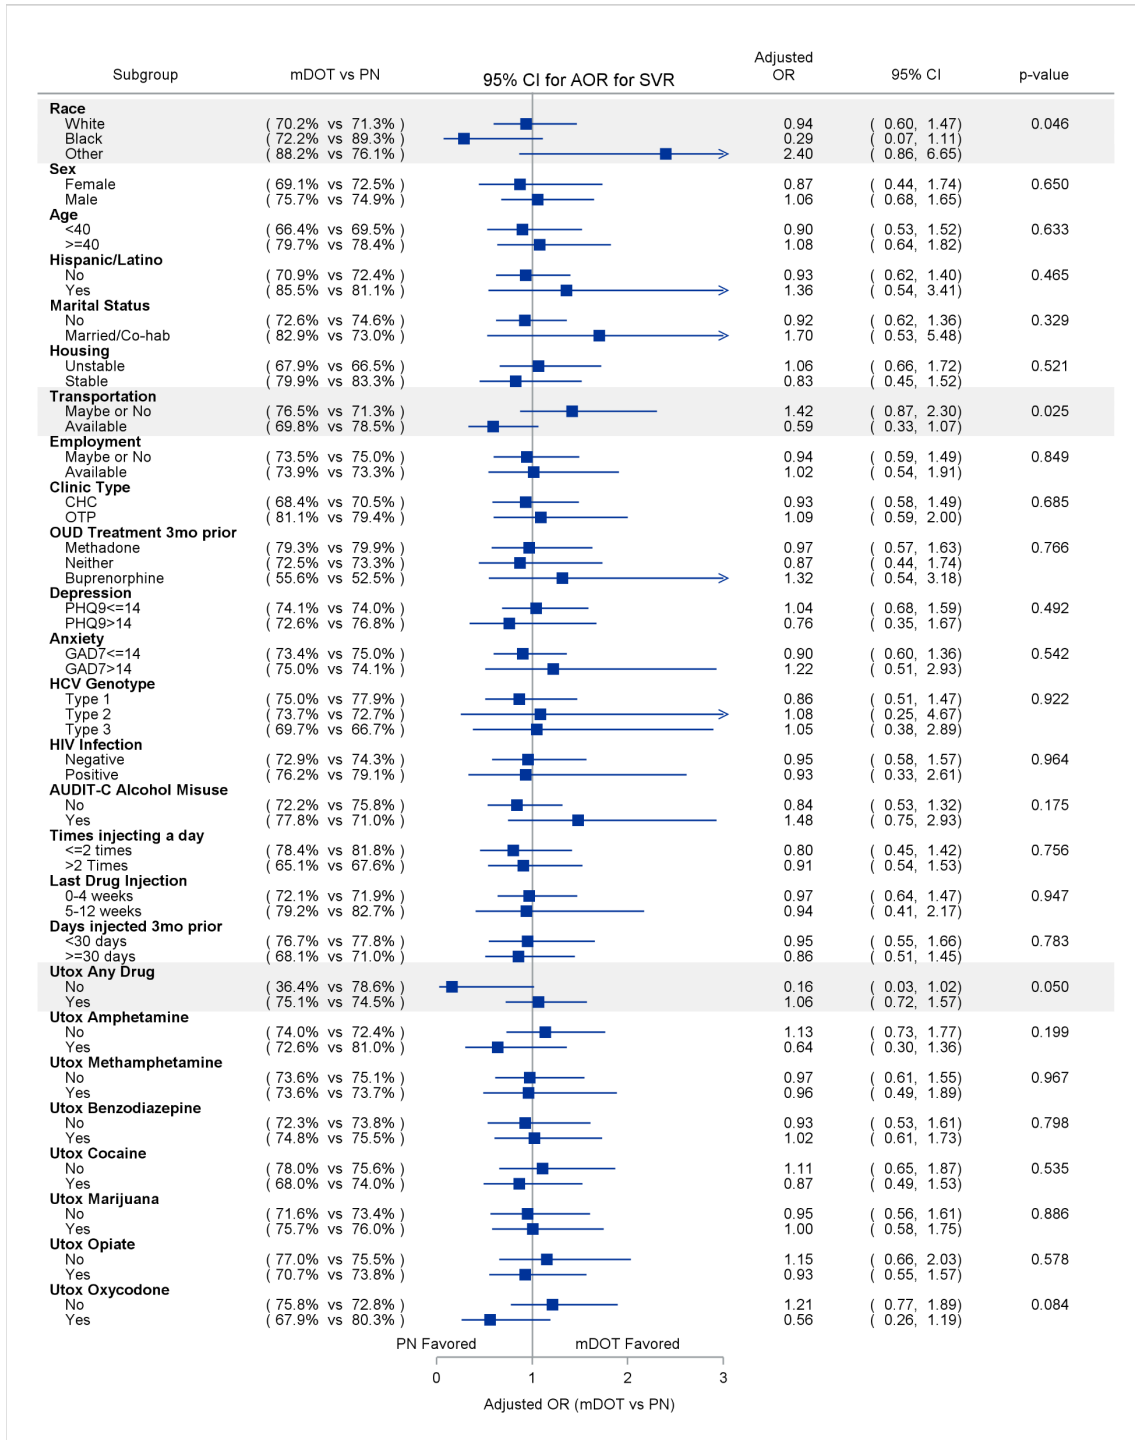

C

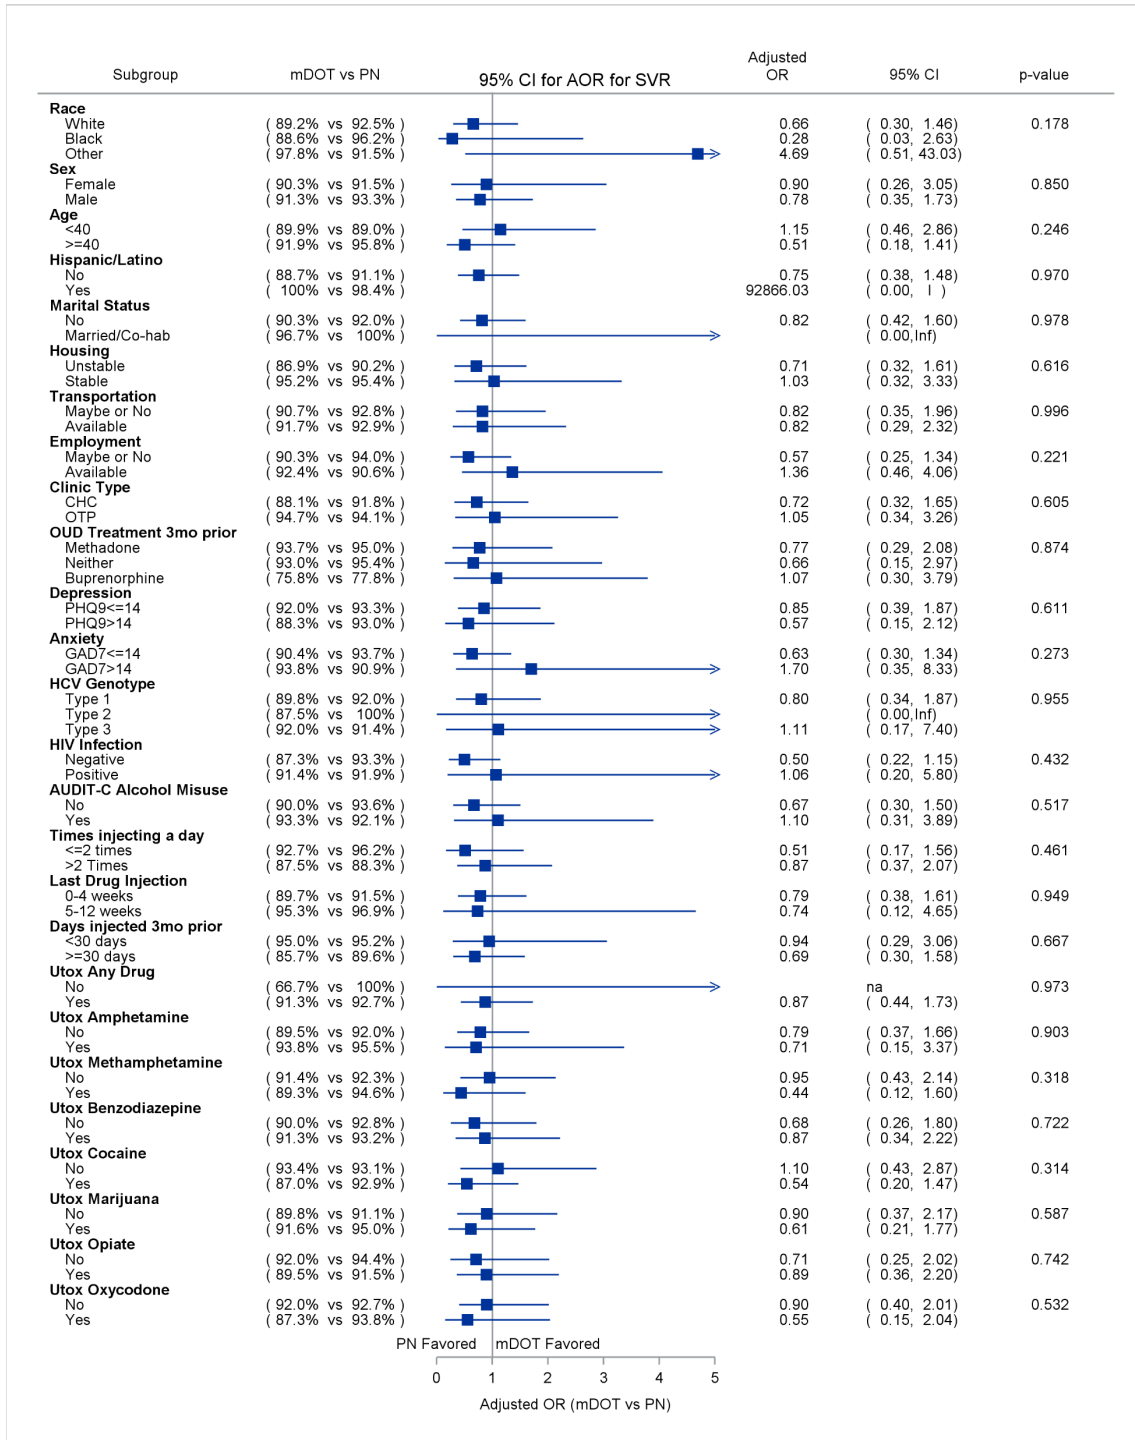

AOR, adjusted odds ratio; AUDIT-C, Alcohol Use Disorders Identification Test; CHC, community health centers; Co-hab, cohabitation; GAD7, general anxiety disorder 7-item; HCV, hepatitis C virus; ITT, intention to treat; mDOT, modified directly observed therapy; OR, odds ratio; OTP, opioid treatment programs; OUD, opioid use disorder; PHQ-9, Patient Health Questionnaire-9; PN, patient navigator; SVR, sustained virologic response; UTOX, urine toxicology screen.

**Figure S8.** Factors With Between-Subgroup Heterogeneous Intervention Effects on Adherence in the mITT (Panel A) and PP (Panel B) Populations

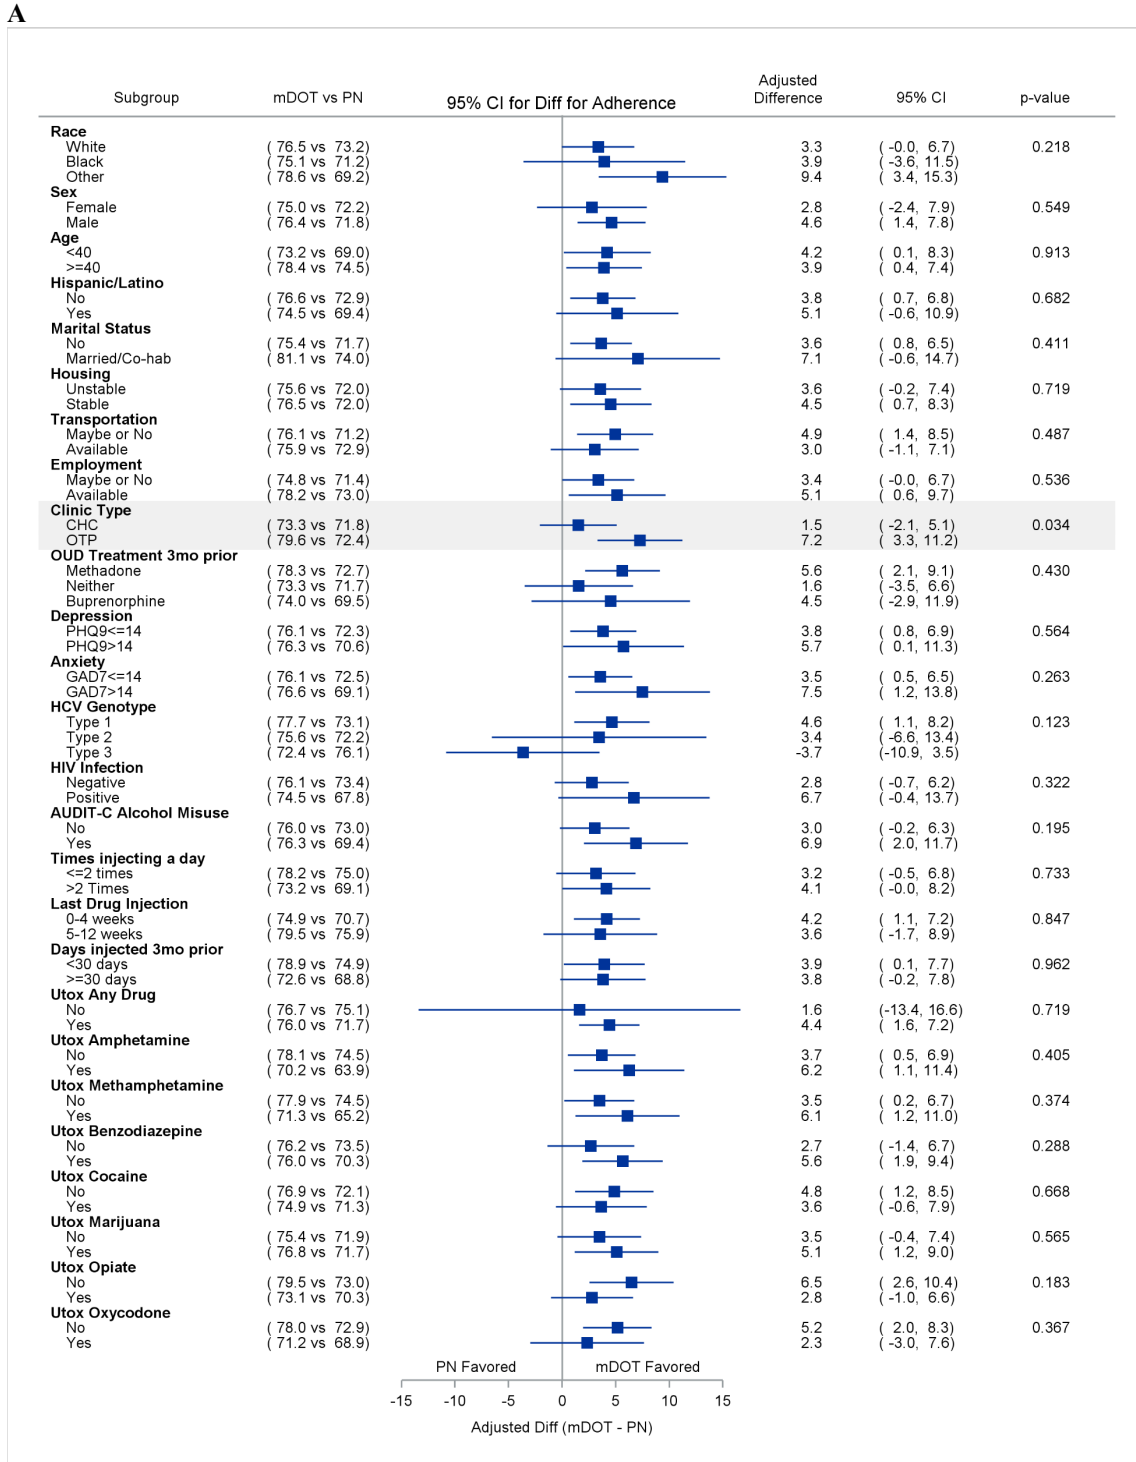

**B**

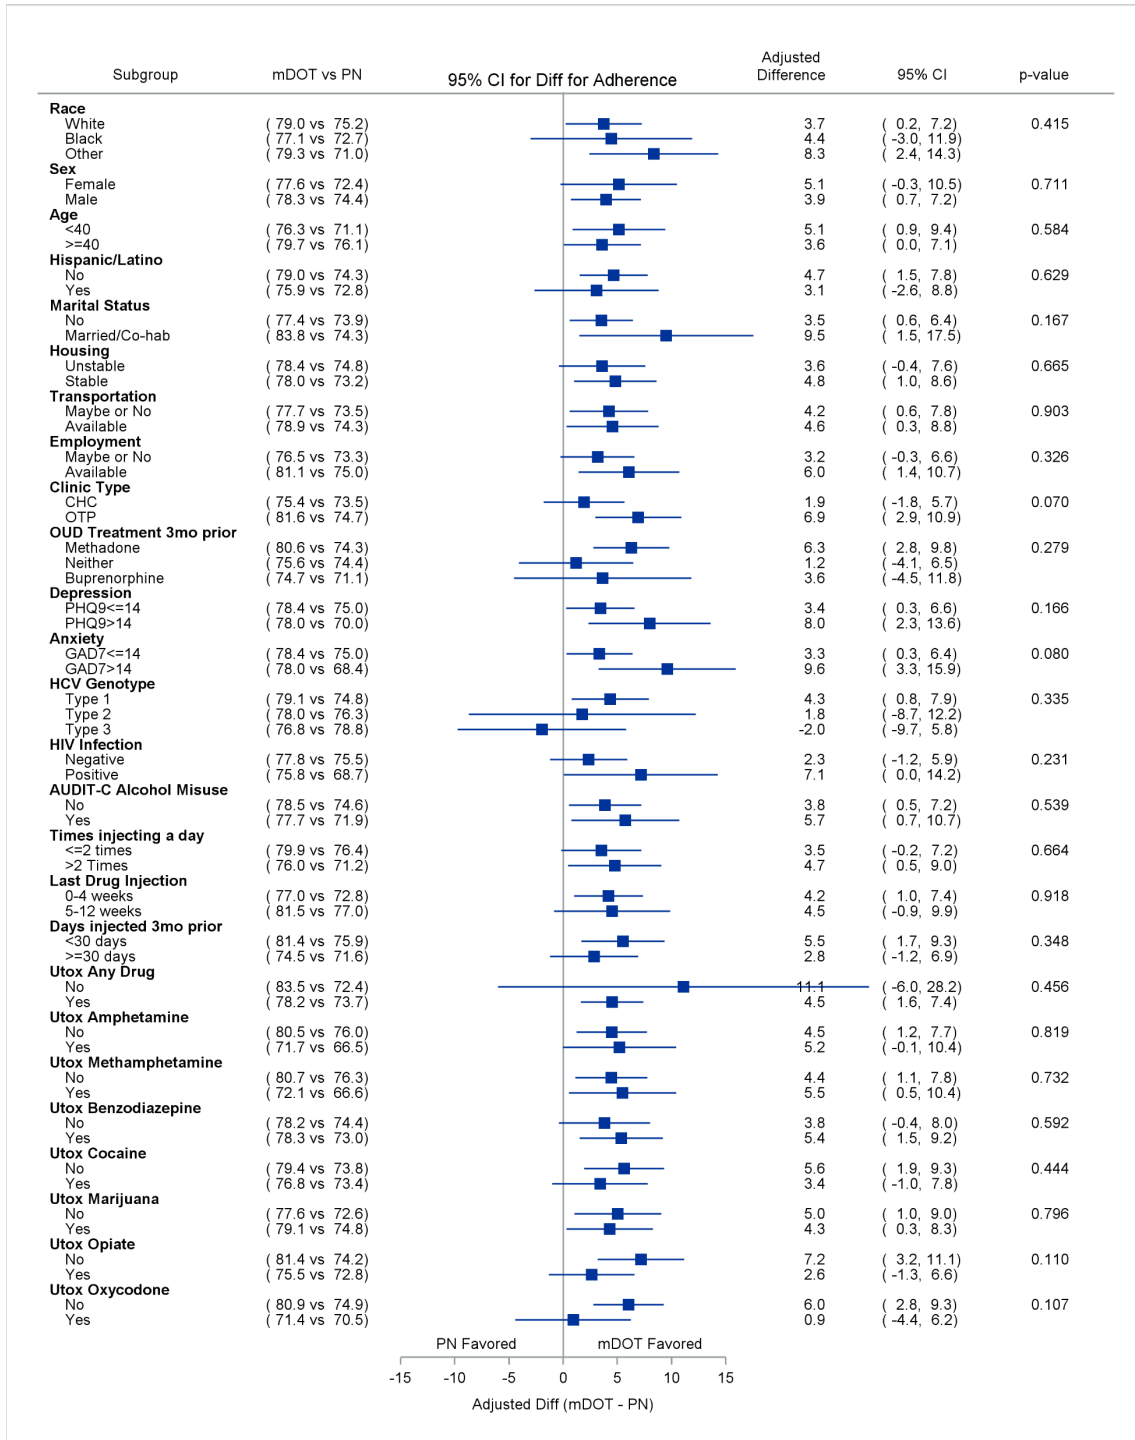

AOR, adjusted odds ratio; AUDIT-C, Alcohol Use Disorders Identification Test; CHC, community health centers; Co-hab, cohabitation; GAD7, general anxiety disorder 7-item; HCV, hepatitis C virus; ITT, intention to treat; mDOT, modified directly observed therapy; OR, odds ratio; OTP, opioid treatment programs; OUD, opioid use disorder; PHQ-9, Patient Health Questionnaire-9; PN, patient navigator; SVR, sustained virologic response; UTOX, urine toxicology screen.

**Figure S9. Factors With Between-Subgroup Heterogeneous Intervention Effects on Treatment Initiation in the ITT Population**

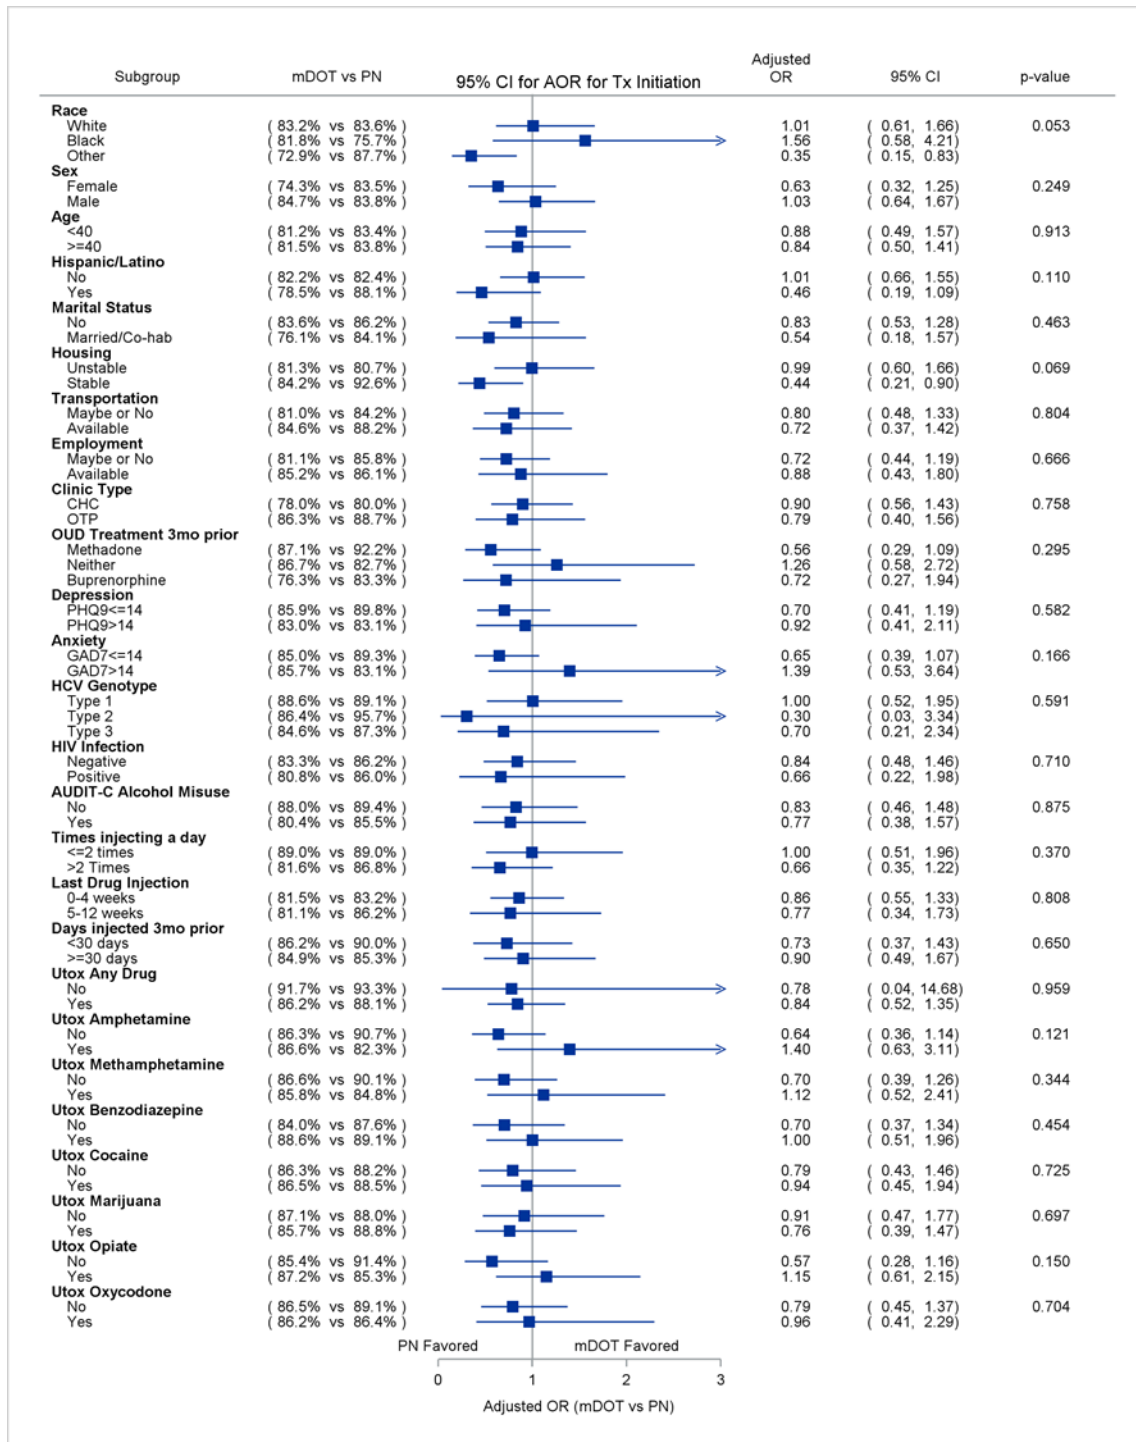

AOR, adjusted odds ratio; AUDIT-C, Alcohol Use Disorders Identification Test; CHC, community health centers; Co-hab, cohabitation; GAD7, general anxiety disorder 7-item; HCV, hepatitis C virus; ITT, intention to treat; mDOT, modified directly observed therapy; OR, odds ratio; OTP, opioid treatment programs; OUD, opioid use disorder; PHQ-9, Patient Health Questionnaire-9; PN, patient navigator; SVR, sustained virologic response; Tx, treatment; UTOX, urine toxicology screen.

**Figure S10. Factors With Between-Subgroup Heterogeneous Intervention Effects on Treatment Completion in the ITT (Panel A), mITT (Panel B), and PP (Panel C) Populations**

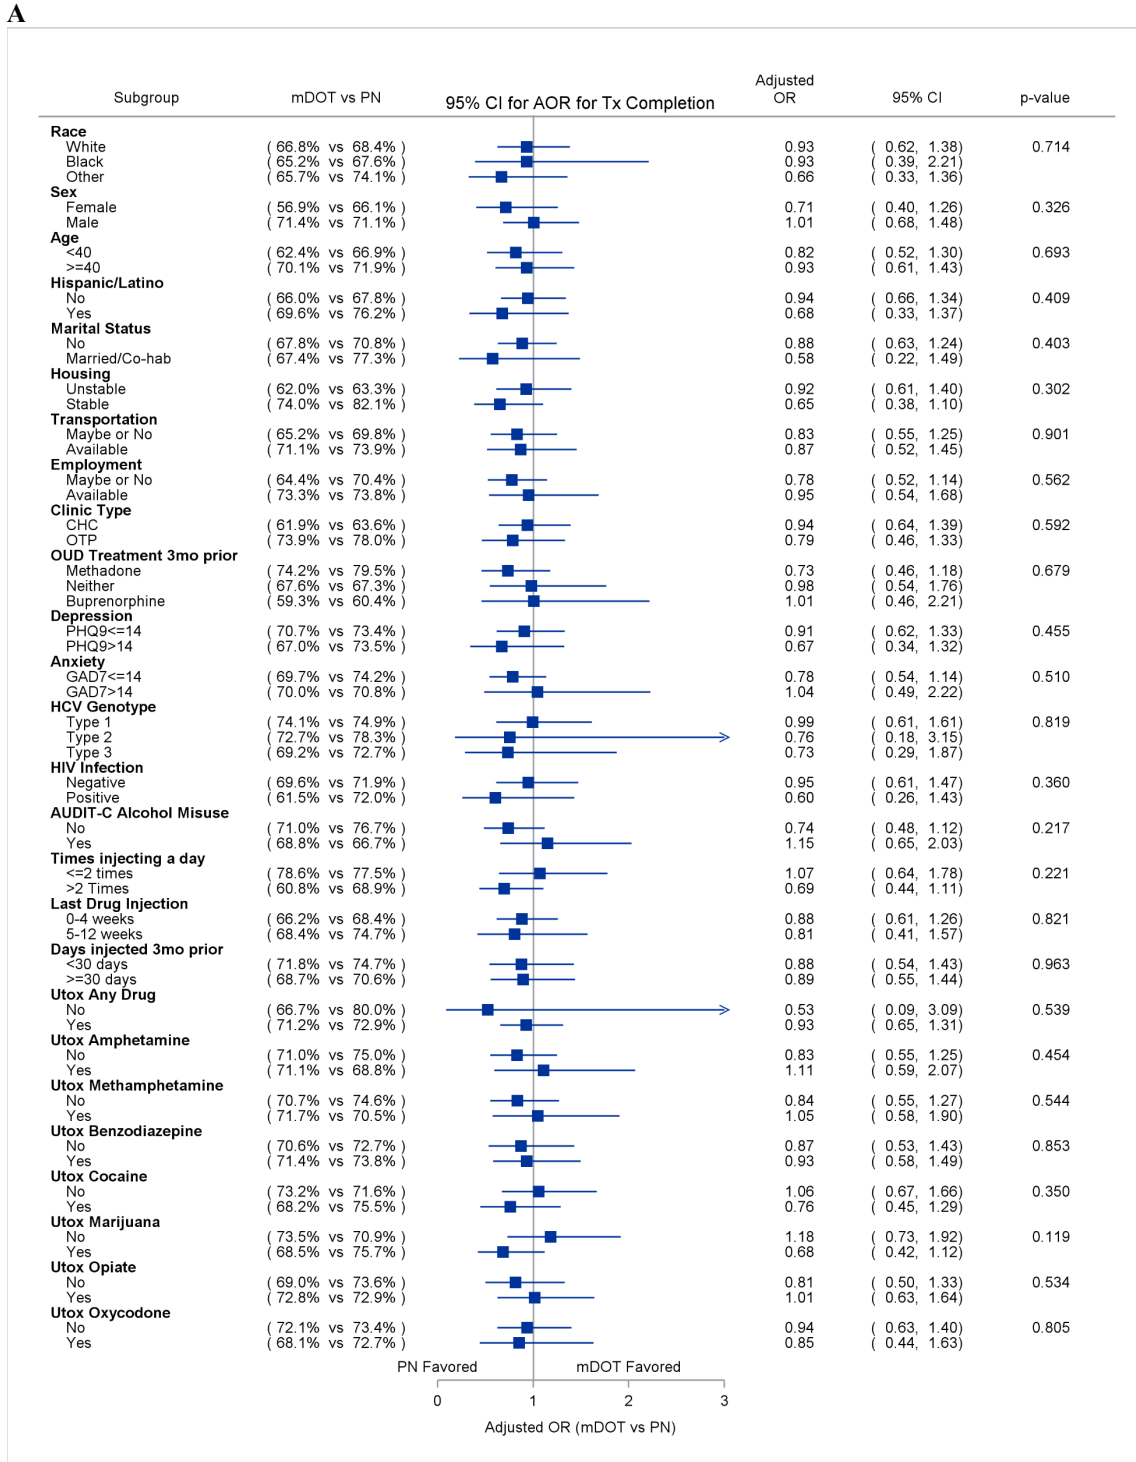



**B**

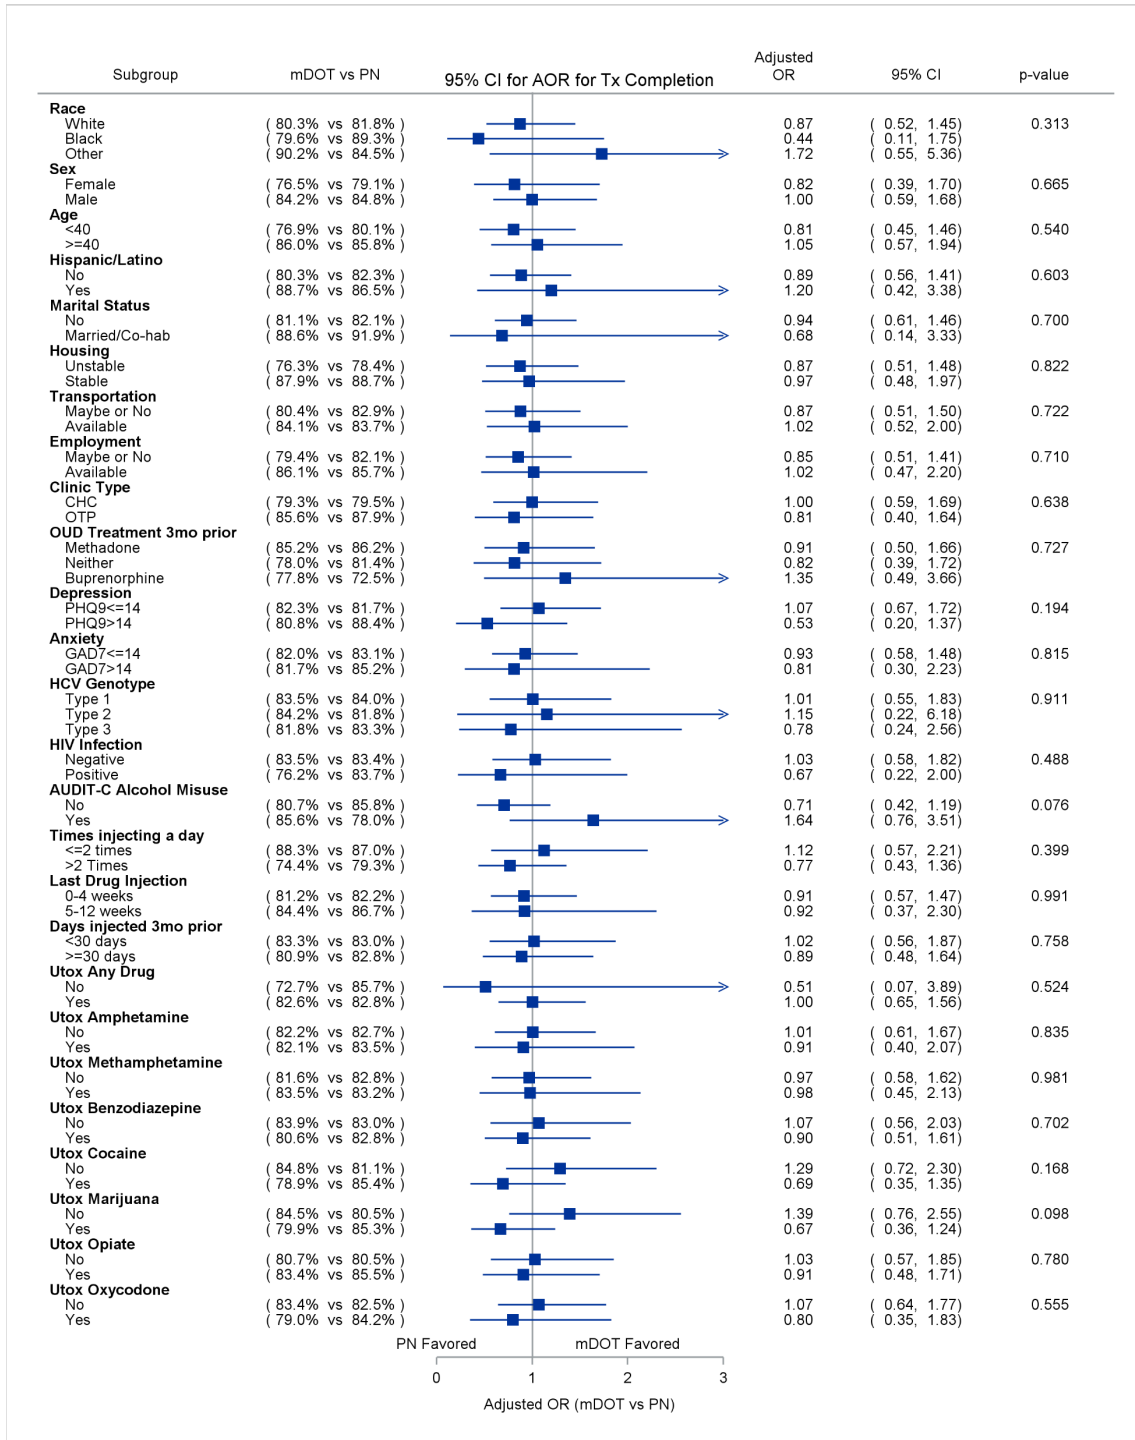



C

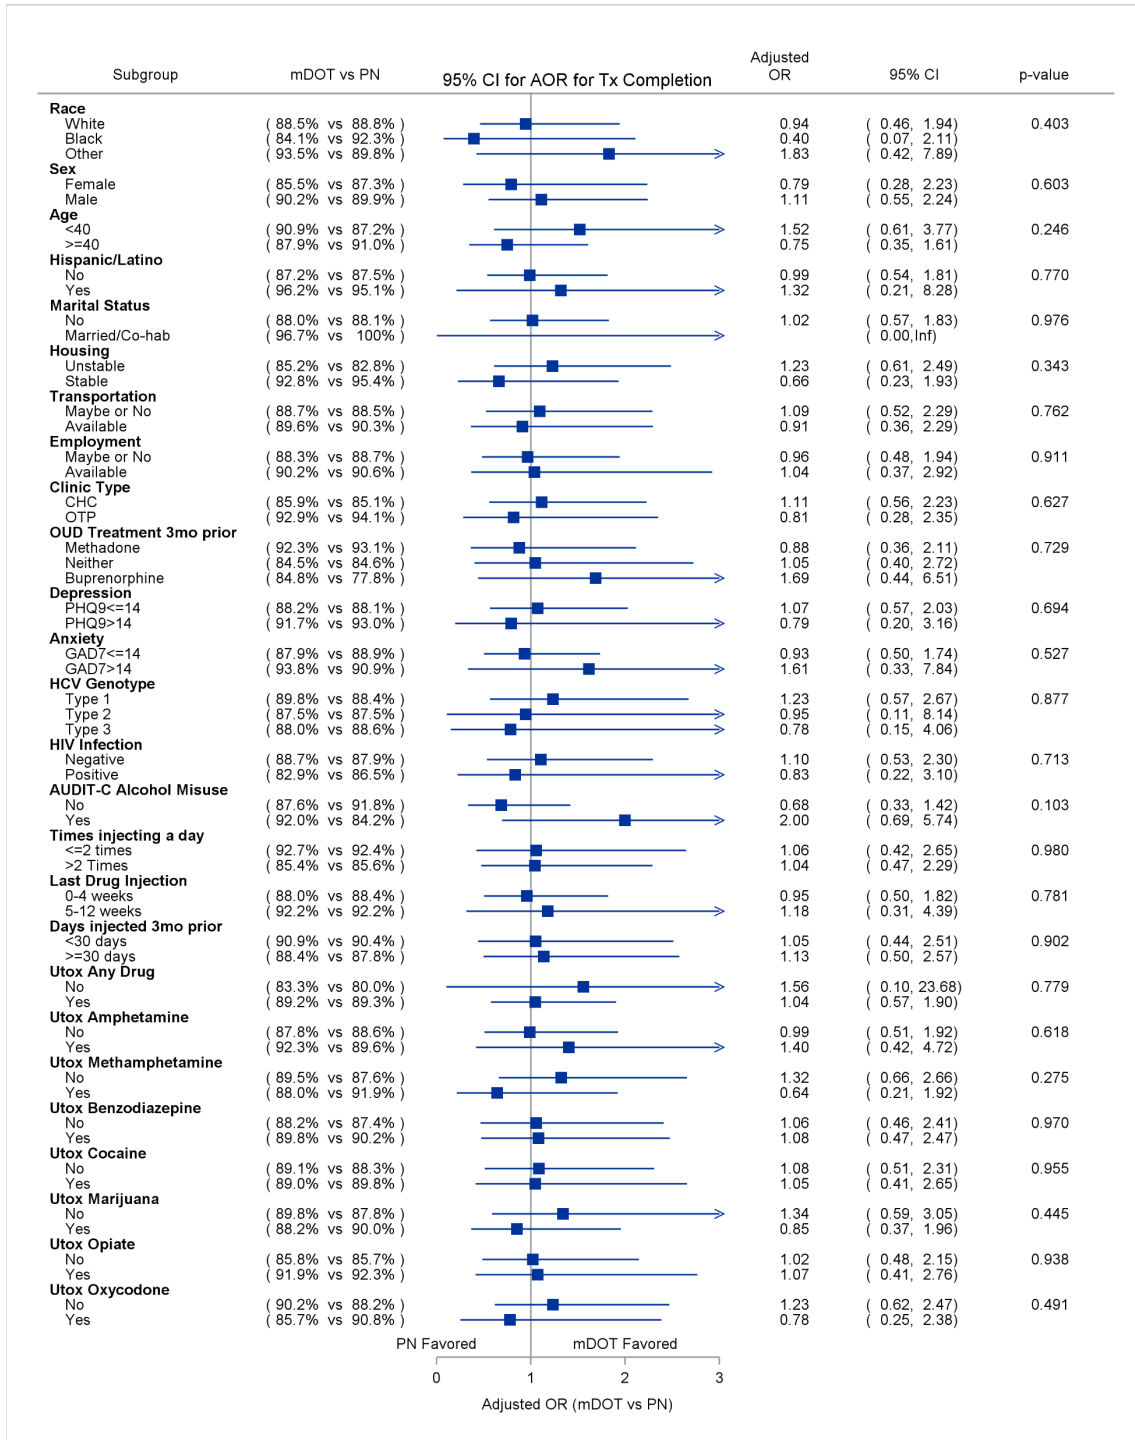

AOR, adjusted odds ratio; AUDIT-C, Alcohol Use Disorders Identification Test; CHC, community health centers; Co-hab, cohabitation; GAD7, general anxiety disorder 7-item; HCV, hepatitis C virus; ITT, intention to treat; mDOT, modified directly observed therapy; OR, odds ratio; OTP, opioid treatment programs; OUD, opioid use disorder; PHQ-9, Patient Health Questionnaire-9; PN, patient navigator; SVR, sustained virologic response; Tx, treatment; UTOX, urine toxicology screen.

**Table S1.** Baseline Characteristics of HERO Participants Among PP Sample.

| Characteristic                        | Category                                     | Total<br>(N=501) <sup>a</sup> | DOT<br>(N=248) <sup>a</sup> | PN<br>(N=253) <sup>a</sup> | <i>P</i> <sup>b</sup> |
|---------------------------------------|----------------------------------------------|-------------------------------|-----------------------------|----------------------------|-----------------------|
| <b>Demographic Characteristics</b>    |                                              |                               |                             |                            |                       |
| Gender, n (%)                         | Female                                       | 133 (26.5)                    | 62 (25.0)                   | 71 (28.1)                  | 0.654                 |
|                                       | Male                                         | 363 (72.5)                    | 184 (74.2)                  | 179 (70.8)                 |                       |
|                                       | Transgender or gender non-conforming         | 5 (1.0)                       | 2 (0.8)                     | 3 (1.2)                    |                       |
| Age                                   | Mean (SD)                                    | 44.0 (11.5)                   | 44.6 (11.7)                 | 43.4 (11.3)                | 0.211                 |
|                                       | Median (Q1, Q3)                              | 42.6 (35.3, 53.7)             | 44.0 (35.7, 54.6)           | 41.6 (35.1, 51.1)          |                       |
| Race, n (%)                           | White/Caucasian                              | 308 (63.8)                    | 148 (62.2)                  | 160 (65.3)                 | 0.037                 |
|                                       | Black/African American                       | 70 (14.5)                     | 44 (18.5)                   | 26 (10.6)                  |                       |
|                                       | Other                                        | 105 (21.7)                    | 46 (19.3)                   | 59 (24.1)                  |                       |
| Latino/Hispanic ethnicity, n (%)      | Yes                                          | 114 (22.8)                    | 53 (21.4)                   | 61 (24.1)                  | 0.465                 |
|                                       | No                                           | 387 (77.2)                    | 195 (78.6)                  | 192 (75.9)                 |                       |
| Marital/cohabitation status, n (%)    | Single/separated/divorced/widowed            | 438 (87.6)                    | 215 (87.0)                  | 223 (88.1)                 | 0.795                 |
|                                       | Married/living together as married           | 57 (11.4)                     | 30 (12.1)                   | 27 (10.7)                  |                       |
|                                       | Other                                        | 5 (1.0)                       | 2 (0.8)                     | 3 (1.2)                    |                       |
| Education, n (%)                      | Less than HS                                 | 118 (23.6)                    | 67 (27.1)                   | 51 (20.2)                  | 0.183                 |
|                                       | HS diploma or GED                            | 189 (37.8)                    | 90 (36.4)                   | 99 (39.1)                  |                       |
|                                       | Some college or more                         | 193 (38.6)                    | 90 (36.4)                   | 103 (40.7)                 |                       |
| Living situation <sup>c</sup> , n (%) | Shelter                                      | 34 (6.8)                      | 20 (8.1)                    | 14 (5.5)                   | 0.741                 |
|                                       | Street/Outdoors                              | 27 (5.4)                      | 16 (6.5)                    | 11 (4.3)                   |                       |
|                                       | Someone else's apartment, room, or house     | 127 (25.4)                    | 60 (24.3)                   | 67 (26.5)                  |                       |
|                                       | Institution                                  | 37 (7.4)                      | 17 (6.9)                    | 20 (7.9)                   |                       |
|                                       | Own/rent apartment, room, or house           | 256 (51.2)                    | 125 (50.6)                  | 131 (51.8)                 |                       |
|                                       | Other                                        | 19 (3.8)                      | 9 (3.6)                     | 10 (4.0)                   |                       |
| Availability of transportation, n (%) | Yes                                          | 209 (41.9)                    | 96 (38.9)                   | 113 (44.8)                 | 0.414                 |
|                                       | Maybe, if I can get a ride                   | 26 (5.2)                      | 16 (6.5)                    | 10 (4.0)                   |                       |
|                                       | Maybe, if public transportation is available | 260 (52.1)                    | 133 (53.8)                  | 127 (50.4)                 |                       |
|                                       | No                                           | 4 (0.8)                       | 2 (0.8)                     | 2 (0.8)                    |                       |
|                                       | Yes                                          | 177 (35.5)                    | 92 (37.4)                   | 85 (33.6)                  | 0.375                 |

| Characteristic                                                    | Category                       | Total<br>(N=501) <sup>a</sup> | DOT<br>(N=248) <sup>a</sup> | PN<br>(N=253) <sup>a</sup> | P <sup>b</sup> |
|-------------------------------------------------------------------|--------------------------------|-------------------------------|-----------------------------|----------------------------|----------------|
| Employed with a regular job or informal work <sup>d</sup> , n (%) | No                             | 322 (64.5)                    | 154 (62.6)                  | 168 (66.4)                 |                |
| <b>Clinical Characteristics</b>                                   |                                |                               |                             |                            |                |
| Clinical setting, n (%)                                           | OTP                            | 232 (46.3)                    | 113 (45.6)                  | 119 (47.0)                 | 0.741          |
|                                                                   | CHC                            | 269 (53.7)                    | 135 (54.4)                  | 134 (53.0)                 |                |
| Any medication for OUD in the past 3 months, n (%)                | Buprenorphine                  |                               |                             |                            |                |
|                                                                   | Yes                            | 70 (14.1)                     | 39 (15.8)                   | 31 (12.4)                  | 0.270          |
|                                                                   | No                             | 428 (85.9)                    | 208 (84.2)                  | 220 (87.6)                 |                |
|                                                                   | Methadone                      |                               |                             |                            |                |
|                                                                   | Yes                            | 302 (60.6)                    | 143 (57.9)                  | 159 (63.3)                 | 0.213          |
|                                                                   | No                             | 196 (39.4)                    | 104 (42.1)                  | 92 (36.7)                  |                |
| Depression PHQ-9 severity, n (%)                                  | Mild (<10)                     | 259 (52.0)                    | 130 (52.6)                  | 129 (51.4)                 | 0.751          |
|                                                                   | Moderate (10-14)               | 122 (24.5)                    | 57 (23.1)                   | 65 (25.9)                  |                |
|                                                                   | Moderately severe/severe (>14) | 117 (23.5)                    | 60 (24.3)                   | 57 (22.7)                  |                |
| Anxiety GAD-7 severity, n (%)                                     | Mild (<10)                     | 309 (62.2)                    | 144 (58.5)                  | 165 (65.7)                 | 0.218          |
|                                                                   | Moderate (10-14)               | 96 (19.3)                     | 54 (22.0)                   | 42 (16.7)                  |                |
|                                                                   | Moderately severe/severe (>14) | 92 (18.5)                     | 48 (19.5)                   | 44 (17.5)                  |                |
| Genotype, n (%)                                                   | Type 1                         | 275 (73.7)                    | 137 (75.3)                  | 138 (72.3)                 | 0.714          |
|                                                                   | Type 2                         | 32 (8.6)                      | 16 (8.8)                    | 16 (8.4)                   |                |
|                                                                   | Type 3                         | 60 (16.1)                     | 25 (13.7)                   | 35 (18.3)                  |                |
|                                                                   | Type 4                         | 3 (0.8)                       | 2 (1.1)                     | 1 (0.5)                    |                |
|                                                                   | Mixed                          | 3 (0.8)                       | 2 (1.1)                     | 1 (0.5)                    |                |
| HIV infection (positive), n (%)                                   | Yes                            | 72 (19.8)                     | 35 (19.8)                   | 37 (19.9)                  | 1.000          |
|                                                                   | No                             | 291 (80.2)                    | 142 (80.2)                  | 149 (80.1)                 |                |
| Cirrhosis (positive), n (%)                                       | Yes                            | 31 (6.2)                      | 16 (6.5)                    | 15 (5.9)                   | 0.808          |
|                                                                   | No                             | 470 (93.8)                    | 232 (93.5)                  | 238 (94.1)                 |                |
| Alcohol misuse <sup>e</sup> , n (%)                               | Yes                            | 151 (30.7)                    | 75 (30.6)                   | 76 (30.8)                  | 0.970          |
|                                                                   | No                             | 341 (69.3)                    | 170 (69.4)                  | 171 (69.2)                 |                |
| Last drug injection (within 3 months of screening), n (%)         | 0-4 weeks                      | 373 (74.5)                    | 184 (74.2)                  | 189 (74.7)                 | 0.640          |
|                                                                   | 5-8 weeks                      | 85 (17.0)                     | 45 (18.1)                   | 40 (15.8)                  |                |
|                                                                   | 9-12 weeks                     | 43 (8.6)                      | 19 (7.7)                    | 24 (9.5)                   |                |
|                                                                   | Yes                            | 475 (95.2)                    | 233 (94.3)                  | 242 (96.0)                 | 0.375          |

| Characteristic                                                          | Category         | Total<br>(N=501) <sup>a</sup> | DOT<br>(N=248) <sup>a</sup> | PN<br>(N=253) <sup>a</sup> | <i>P</i> <sup>b</sup> |
|-------------------------------------------------------------------------|------------------|-------------------------------|-----------------------------|----------------------------|-----------------------|
| Drug injection reported within 3 months of baseline <sup>f, n</sup> (%) | No               | 24 (4.8)                      | 14 (5.7)                    | 10 (4.0)                   |                       |
| Number of days injected drugs in the past 3 months <sup>f,g</sup>       | Mean (SD)        | 32.6 (30.5)                   | 32.0 (29.1)                 | 33.2 (31.8)                | 0.938                 |
|                                                                         | Median (Q1, Q3)  | 24.0 (5.0, 60.0)              | 25.0 (6.0, 50.0)            | 21.0 (5.0, 60.0)           |                       |
| Times injecting drugs a day <sup>f,h</sup>                              | Mean (SD)        | 2.9 (2.7)                     | 2.8 (2.3)                   | 3.0 (2.9)                  | 0.305                 |
|                                                                         | Median (Q1, Q3)  | 2.0 (1.0, 3.0)                | 2.0 (1.0, 3.0)              | 2.0 (1.0, 3.0)             |                       |
|                                                                         | ≤2 times per day | 268 (56.4%)                   | 137 (58.8%)                 | 131 (54.1%)                |                       |
|                                                                         | >2 times per day | 207 (43.6%)                   | 96 (41.2%)                  | 111 (45.9%)                |                       |
| <b>Urine Drug Screen Results at Baseline Visit<sup>i</sup>, n (%)</b>   |                  |                               |                             |                            |                       |
| Any drug <sup>j</sup>                                                   | Yes              | 464 (96.7)                    | 231 (97.5)                  | 233 (95.9)                 | 0.334                 |
|                                                                         | No               | 16 (3.3)                      | 6 (2.5)                     | 10 (4.1)                   |                       |
| Amphetamine                                                             | Yes              | 132 (27.5)                    | 65 (27.4)                   | 67 (27.6)                  | 0.972                 |
|                                                                         | No               | 348 (72.5)                    | 172 (72.6)                  | 176 (72.4)                 |                       |
| Methamphetamine                                                         | Yes              | 149 (31.0)                    | 75 (31.6)                   | 74 (30.5)                  | 0.778                 |
|                                                                         | No               | 331 (69.0)                    | 162 (68.4)                  | 169 (69.5)                 |                       |
| Benzodiazepine                                                          | Yes              | 259 (54.0)                    | 127 (53.6)                  | 132 (54.3)                 | 0.872                 |
|                                                                         | No               | 221 (46.0)                    | 110 (46.4)                  | 111 (45.7)                 |                       |
| Cocaine                                                                 | Yes              | 198 (41.3)                    | 100 (42.2)                  | 98 (40.3)                  | 0.678                 |
|                                                                         | No               | 282 (58.8)                    | 137 (57.8)                  | 145 (59.7)                 |                       |
| THC/cannabis                                                            | Yes              | 239 (49.8)                    | 119 (50.2)                  | 120 (49.4)                 | 0.856                 |
|                                                                         | No               | 241 (50.2)                    | 118 (49.8)                  | 123 (50.6)                 |                       |
| Opiate                                                                  | Yes              | 241 (50.2)                    | 124 (52.3)                  | 117 (48.1)                 | 0.361                 |
|                                                                         | No               | 239 (49.8)                    | 113 (47.7)                  | 126 (51.9)                 |                       |
| Oxycodone                                                               | Yes              | 128 (26.7)                    | 63 (26.6)                   | 65 (26.7)                  | 0.967                 |
|                                                                         | No               | 352 (73.3)                    | 174 (73.4)                  | 178 (73.3)                 |                       |

CHC denotes community health centers, DOT directly observed therapy, GAD-7 General Anxiety Disorder-7 scale, GED General Educational Development, HS high school, ITT intention-to-treat, mITT modified intention-to-treat, OTP opioid treatment program, OUD opioid use disorder, PHQ-9 Patient Health Questionnaire-9, PN patient navigation, PP per-protocol, THC tetrahydrocannabinol.

<sup>a</sup>Extent of missing observations varies across the characteristics.

<sup>b</sup>*P* values are based on Chi-square, Fisher exact, t, or Wilcoxon test comparing between DOT and PN groups among the mITT sample.

<sup>c</sup>Participants were asked: "In the last 3 months, where have you been living most of the time?" Answers included: shelter; street/outdoors; someone else's apartment, room, or house; institution (institution, hallway house, residential treatment facility/program); own/rent apartment, house, or room; other (dormitory/college residence, other, refused, don't know).

<sup>d</sup>Participants were asked: "In the last 3 months, what were your sources of income?" Employed was defined as including (a) a regular job and (b) informal work.

<sup>e</sup>Based on the Alcohol Use Disorders Identification Test score: yes (alcohol misuse vs no). Note that

cutoffs are different for male and female participants.

<sup>f</sup>Percentage calculated based upon the Behavioral Risk Assessment administered at baseline visit.

<sup>g</sup>Participants were asked: "In the past 3 months, on how many DAYS did you shoot up anything, including prescribed medications not intended to be injected?"

<sup>h</sup>Participants were asked: "How many times a day did you usually inject on the days you injected?"

<sup>i</sup>Percentages calculated based upon conducted urine drug screen at baseline visit.

<sup>j</sup>Positive for any drug toxicology (including cannabis, barbituates, buprenorphine, and methadone).

**Table S2 .** Distribution of SAE by the study arms from N=219 participants (N=109 from mDOT and N=110 for PN)

| <b>Serious Adverse Event</b>                       | <b>Total N(%)</b> | <b>mDOT</b> | <b>PN</b>   |
|----------------------------------------------------|-------------------|-------------|-------------|
| Death                                              | 35 (8.3%)         | 17 (7.8%)   | 18 (8.8%)   |
| Life threatening                                   | 17 (4.0%)         | 6 (2.8%)    | 11 (5.4%)   |
| Hospitalization                                    | 337 (80.1%)       | 176 (81.1%) | 161 (78.9%) |
| Disability or permanent change                     | 1 (0.2%)          | 0 (0.0%)    | 1 (0.5%)    |
| Required intervention to prevent impairment/damage | 2 (0.5%)          | 1 (0.5%)    | 1 (0.5%)    |
| Other serious important medical event              | 29 (6.9%)         | 17 (7.8%)   | 12 (5.9%)   |
| Total                                              | 421               | 217         | 204         |
